# Supplementary material
Source: PubMed Central journal article supplement (PMC4640768)
Supplement: pnas.1510432112.sapp.pdf [file pnas.1510432112.sapp.pdf]

## Supporting Information

Tania Keiko Shishido<sup>1</sup>, Jouni Jokela<sup>1</sup>, Clara-Theresia Kolehmainen<sup>1</sup>, David P. Fewer<sup>1</sup>, Matti Wahlsten<sup>1</sup>, Hao Wang<sup>1</sup>, Leo Rouhiainen<sup>1</sup>, Ermanno Rizzi<sup>2</sup>, Gianluca Debellis<sup>2</sup>, Perttu Permi<sup>3</sup>, and Kaarina Sivonen<sup>1</sup>

<sup>1</sup> Department of Food and Environmental Sciences, Viikki Biocenter 1, University of Helsinki, FI-00014, Helsinki, Finland

<sup>2</sup> Institute of Biomedical Technologies, National Research Council, Via Fratelli Cervi N. 93, 20090, Segrate (Milan), Italy

<sup>3</sup> Program in Structural Biology and Biophysics, Institute of Biotechnology/Nuclear Magnetic Resonance Laboratory, University of Helsinki, FI-00014, Helsinki, Finland

### Table of contents:

#### 1. Supporting figures

Fig. S1. Growth of *Anabaena* sp. XPORK13A and quantification of intra- and extracellular anabaenolysin.

Fig. S2. NMR spectra of anabaenolysin C (1, Fig. 2).

Fig. S3. Analysis to reveal the chemical structure of anabaenolysin C.

Fig. S4. Chromatograms of cyclodextrins produced by *Anabaena* sp. XSPORK2A.

Fig. S5. Product ion spectra of protonated cyclodextrins produced by *Anabaena* sp. XSPORK2A.

Fig. S6. NMR spectra of the cyclodextrin mixture from *Anabaena* sp. XSPORK2A and the structure with NMR correlations (See Fig. S4).

Fig. S7. Phylogenetic tree based on sequences of the condensation domains of the anabaenolysin gene cluster.

Fig. S8. Phylogenetic tree base on amino acid sequences from alpha-amylases.

#### 2. Supporting tables

Table S1. Strains analyzed with HPLC for the detection of anabaenolysins.

Table S2. Growth inhibition (mm) of selected mold and yeast species by crude extracts of anabaenolysin-producing *Anabaena* spp. assessed with standard disk diffusion assays.

Table S3. Calculated and experimental accurate masses of anabaenolysin variants A, B and C from *Anabaena* strains, mass errors in ppm and calculated formulas.

Table S4. <sup>1</sup>H and <sup>13</sup>C NMR data for anabaenolysin C (1) from *Anabaena* sp. XPORK13A in *d*<sub>6</sub>-DMSO.

Table S5. Calculated and measured product ion intensities (%) of sodiated diAc- $\alpha$ -CD regioisomers AB, AC and AD; triAc- $\alpha$ -CD regioisomers ABC, ACD and ACE; tetraAc- $\alpha$ -CD regioisomers ABCD, ABCE and ABDE; diAc- $\beta$ -CD regioisomers AB, AC and AD and triAc- $\beta$ -CD regioisomers ABC, ABD, ABE and ACE.

Table S6. <sup>1</sup>H and <sup>13</sup>C NMR data for the cyclodextrin mixture from *Anabaena* sp. XSPORK2A in *d*<sub>6</sub>-DMSO.

Table S7. Prediction of amino acids selected and activated by the adenylation domains in the anabaenolysin gene cluster.

Table S8. Comparison of the first hit from BLASTp in the NCBI database from amino acids sequences of *Anabaena* strains XSPORK2A, XPORK13A and XPORK15F.

Table S9. BLASTn and BLASTp identities between *Anabaena* sp. XSPORK2A and strains XPORK13A and XPORK15F.

Table S10. Primers used for cycle sequencing of the 16S rRNA gene.

### 3. Supporting Materials and Methods

Cyanobacterial culture, DNA extraction and sequencing

Genome sequencing

Anabaenolysin gene cluster

Anabaenolysin and cyclodextrin detection

Antifungal activity

New anabaenolysins C and D

Cyclodextrin isolation

NMR spectroscopy

#### 1. Supporting figures

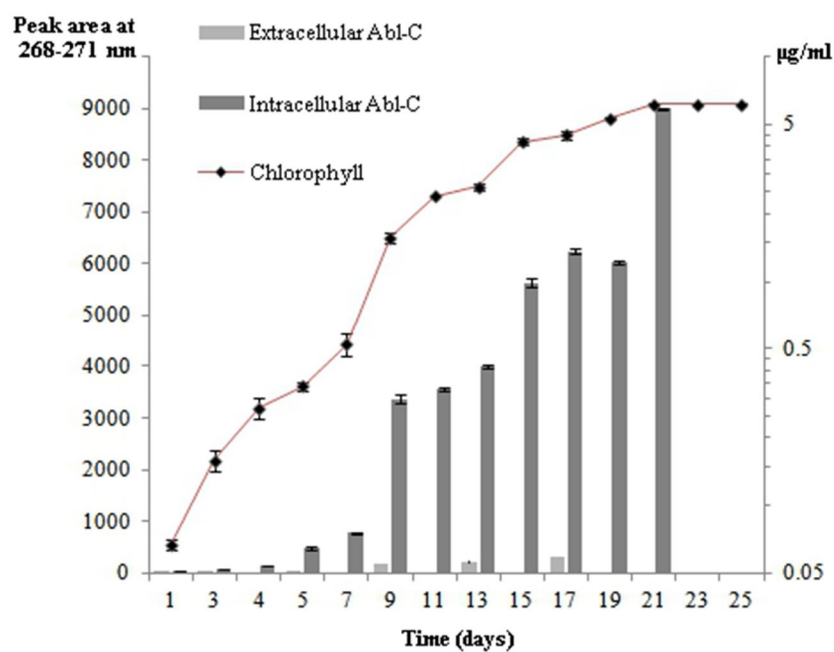

**Fig. S1. Growth of *Anabaena* sp. XPORK13A and quantification of intra- and extracellular anabaenolysin.** Cell growth measured with chlorophyll ( $\mu\text{g/ml}$ ) content in relation to relative intra- and extracellular anabaenolysin C (Abl-C) content (peak area between 268 and 271 nm). Nodes represent mean values. Standard deviation is indicated at each node.

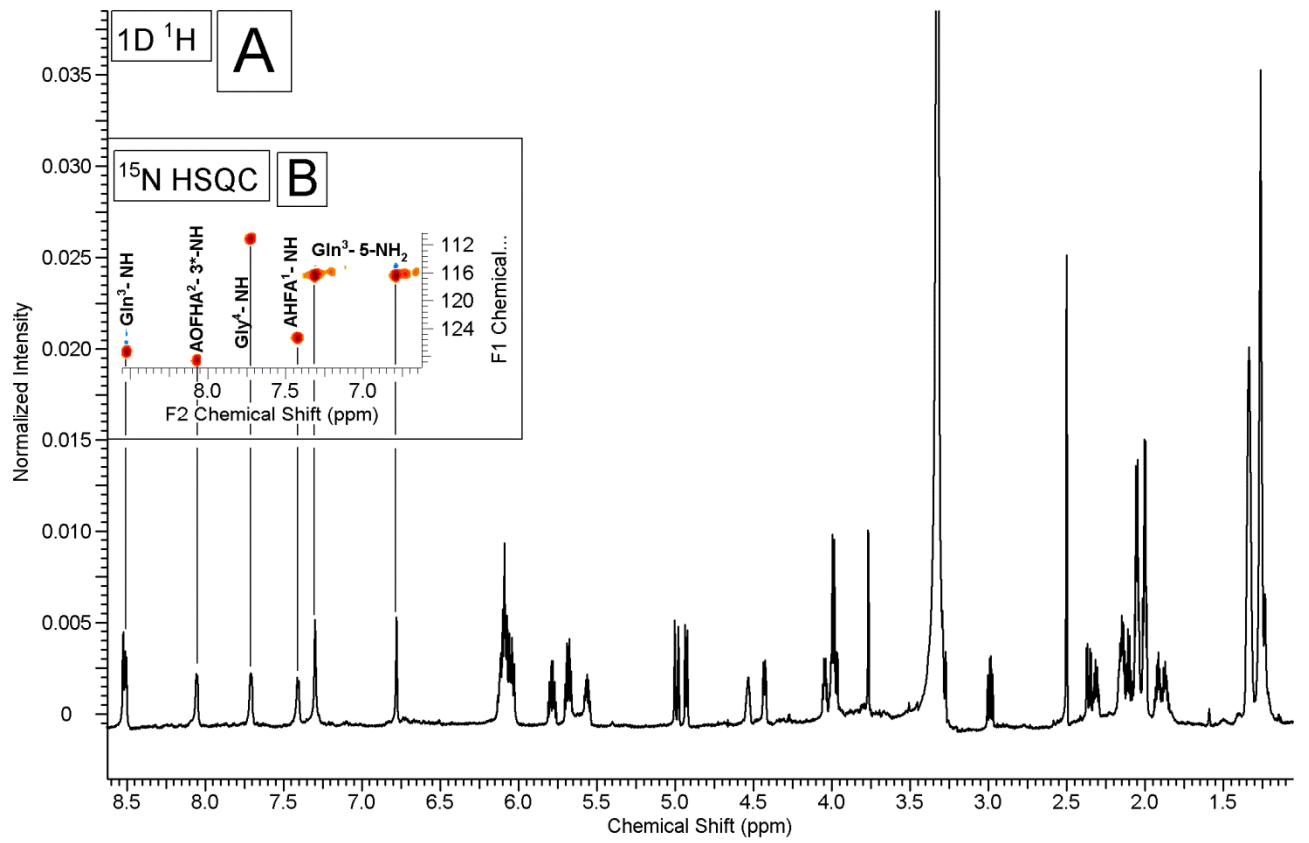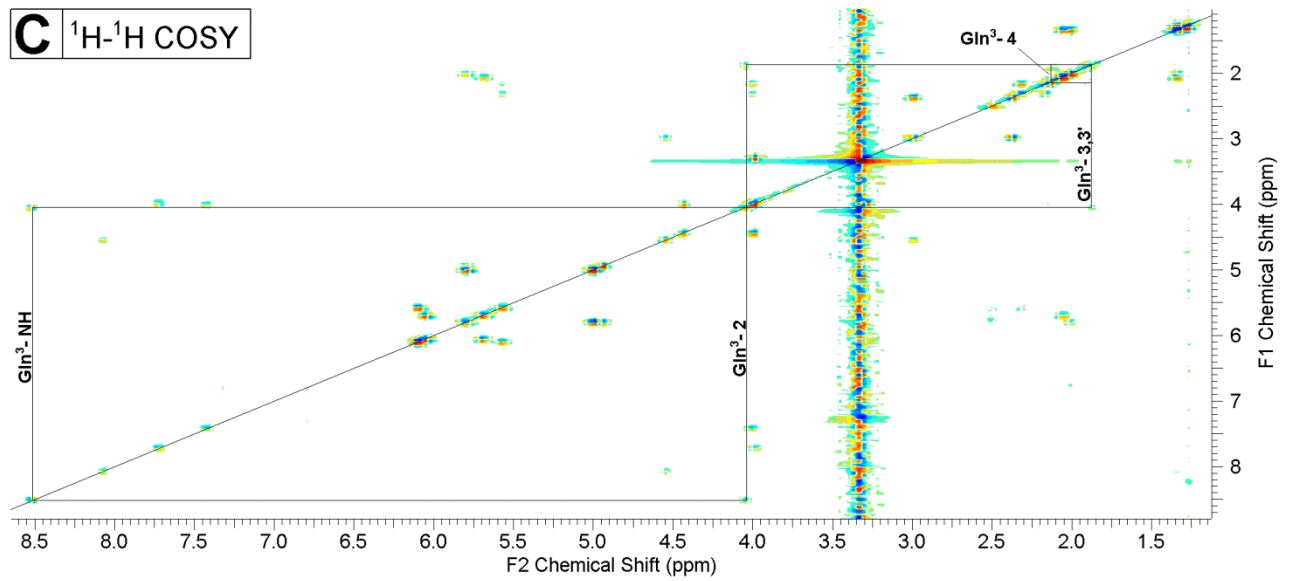

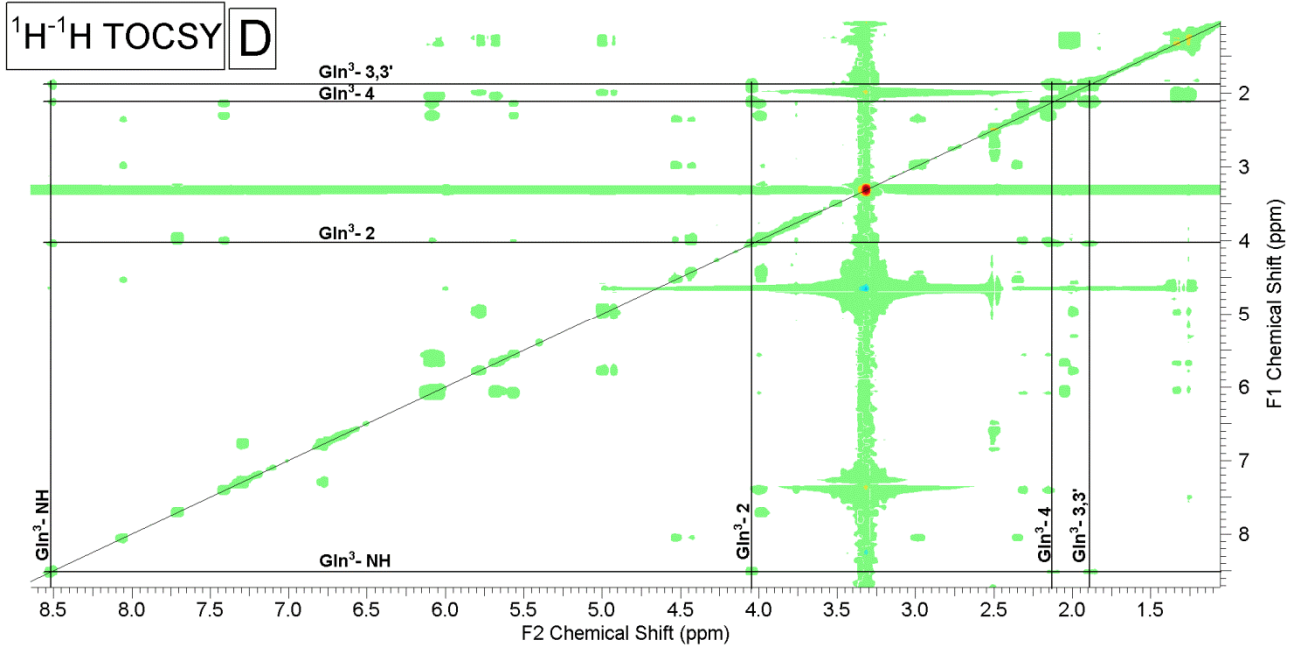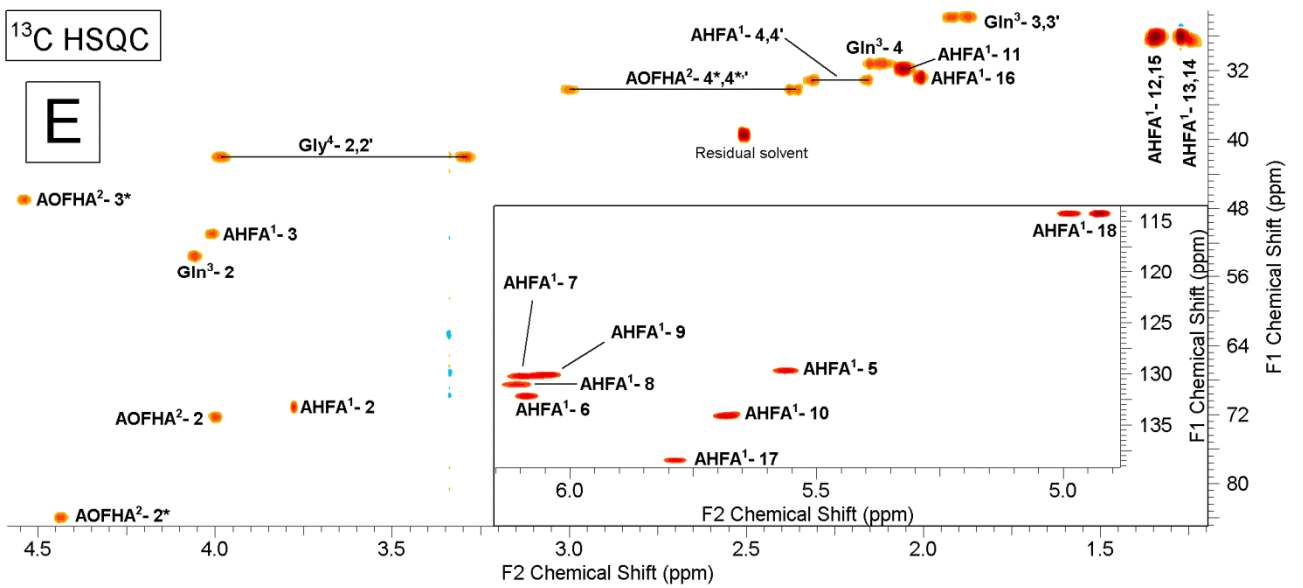

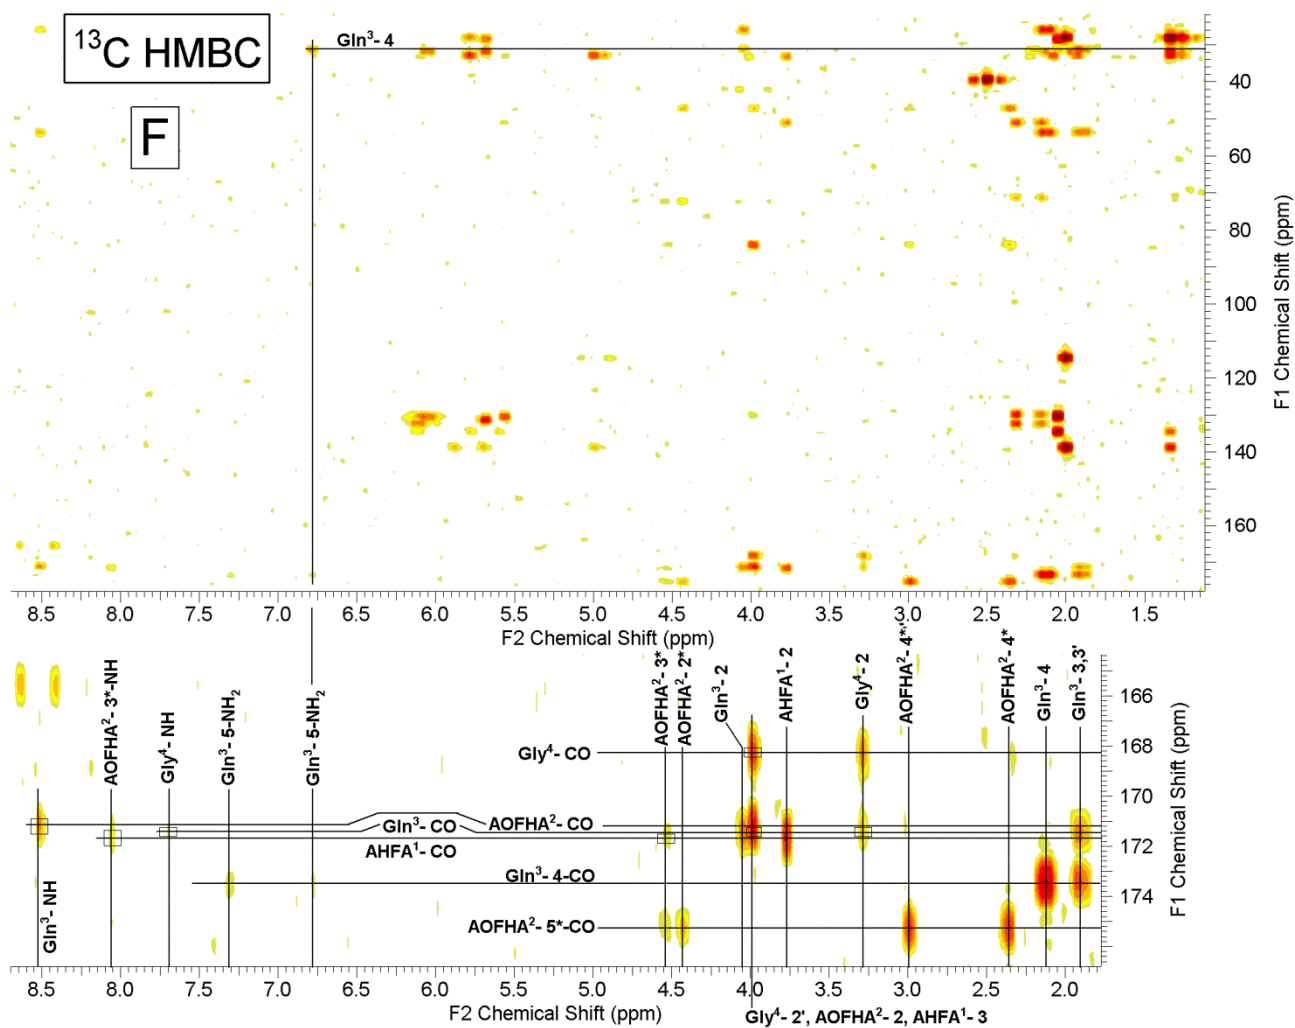

**Fig. S2.** NMR spectra of anabaenolysin C (1, Fig. 2). (A)  $^1\text{H}$  NMR spectrum, (B) annotated  $^{15}\text{N}$ -HSQC spectrum, (C)  $\text{Gln}^3$  annotated  $^1\text{H}$ - $^1\text{H}$  COSY spectrum, (D)  $^1\text{H}$ - $^1\text{H}$  TOCSY spectrum, (E) annotated  $^{13}\text{C}$ -HSQC spectrum, (F) partially annotated  $^{13}\text{C}$  HMBC spectrum in which boxes show the correlations between the subunits. AHFA, AOFHA; see Table S4.

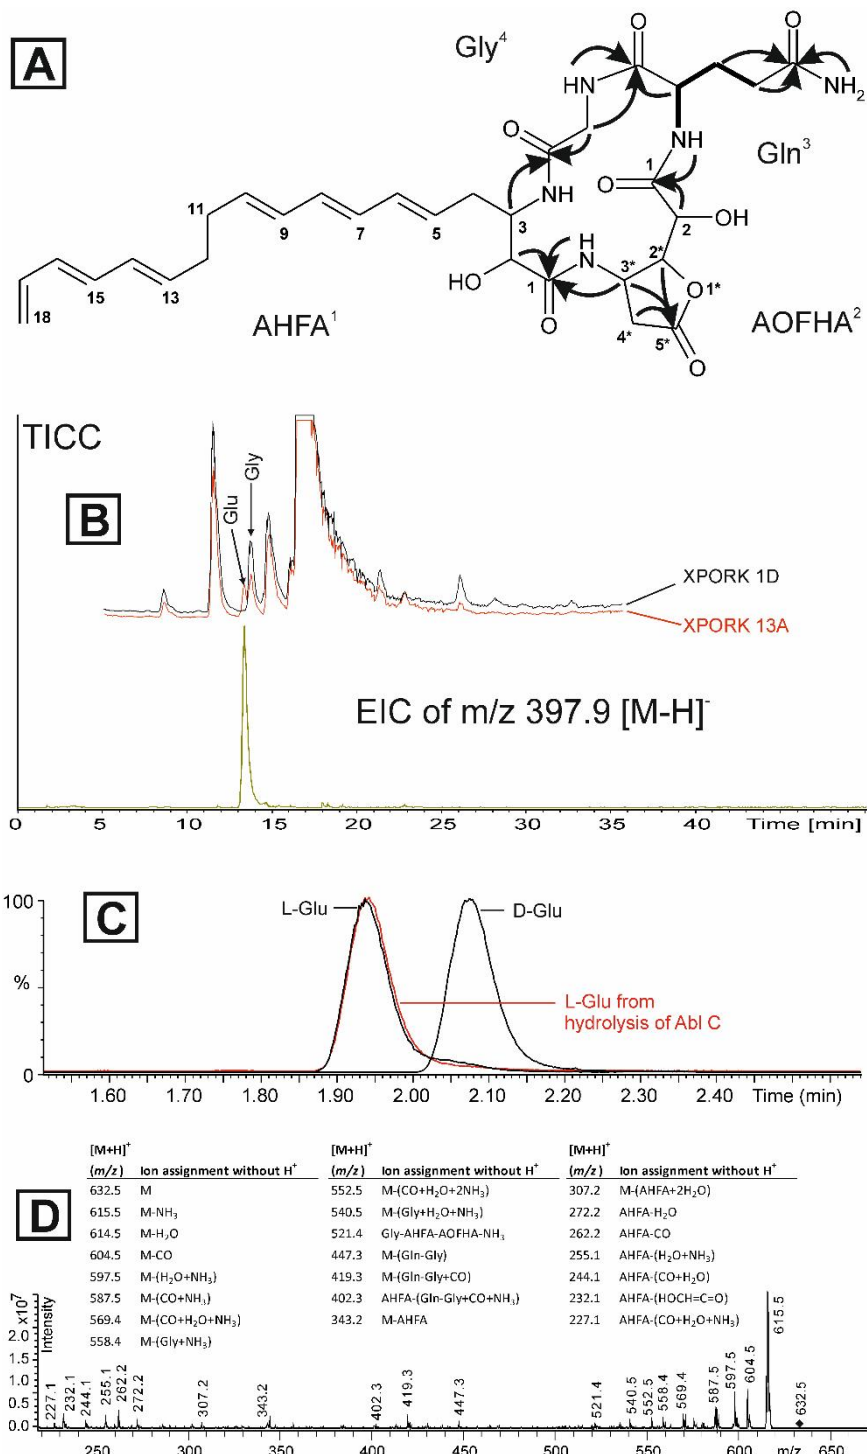

**Fig. S3. Analysis to reveal the chemical structure of anabaenolysin C.** (A) Structure of anabaenolysin C (1) with  $^1H$ - $^1H$  DQF-COSY for Gln<sup>3</sup> (bold lines) and  $^{13}C$  HMBC (arrows) correlations. (B) Total ion current (TICC) and extracted ion chromatogram (EIC  $m/z$  397.9 corresponding to a deprotonated Marfey derivative of Glutamine) of anabaenolysin C from *Anabaena* sp. XPORK13A, and of anabaenolysin B from strain *Anabaena* sp. XPORK1D. (C) Extracted ion chromatograms (EIC  $m/z$  398.0 corresponding to a deprotonated Marfey derivative of Glutamine) of L- and D-Glu standards ( $R_t$  1.94 and 2.07 min, respectively) (Sigma) and L-Glu from acid-hydrolyzed anabaenolysin C ( $R_t$  1.94 min) from *Anabaena* sp. XPORK13A (D) Product ion spectrum from anabaenolysin C ( $m/z$  632.5) from *Anabaena* sp. XPORK13A. AHFA, AOFHA; see Table S4.

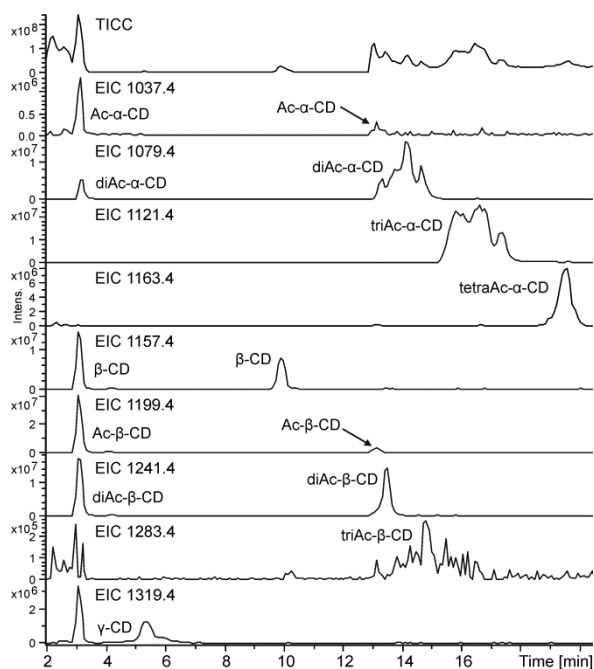

**Fig. S4. Chromatograms of cyclodextrins produced by *Anabaena* sp. XSPORK2A.** TICC = Total ion current chromatogram, EIC = extracted ion chromatogram of cyclodextrins (CD).

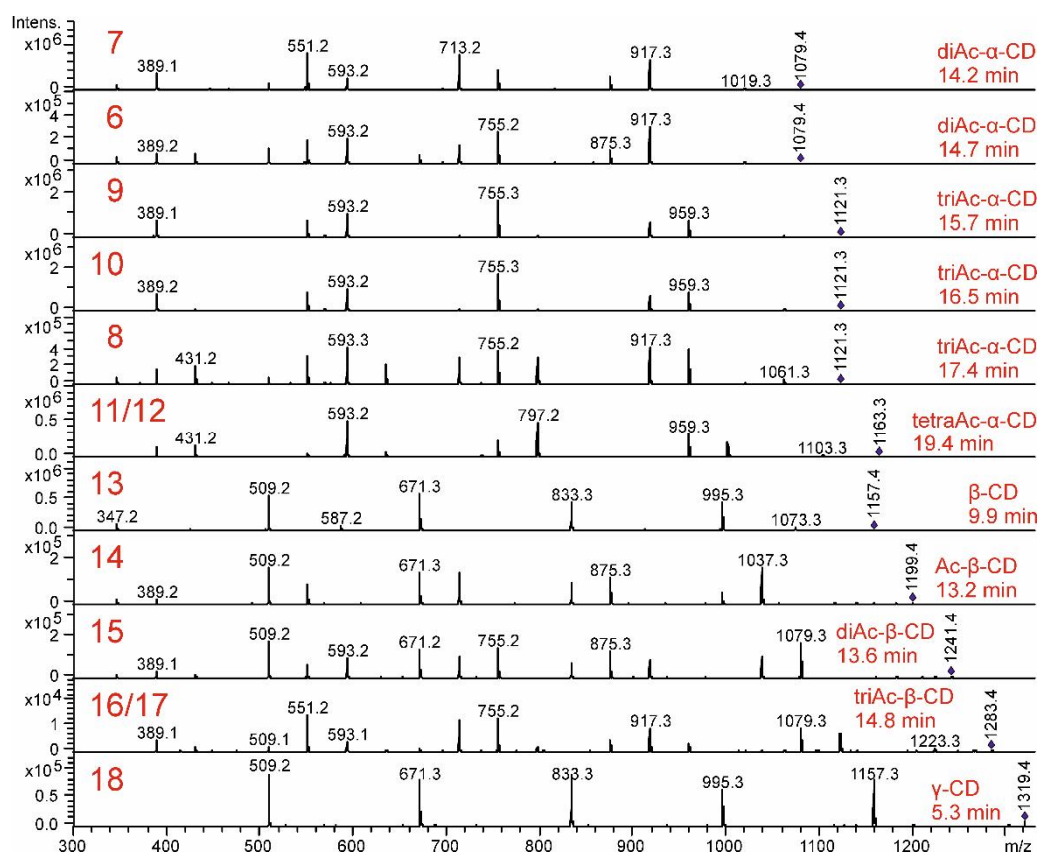

**Fig. S5. Product ion spectra of protonated cyclodextrins produced by *Anabaena* sp. XSPORK2A.** Retention times (min) come from the chromatograms presented in Fig. S4. See compound numbers 6 – 18 from Fig. 2.

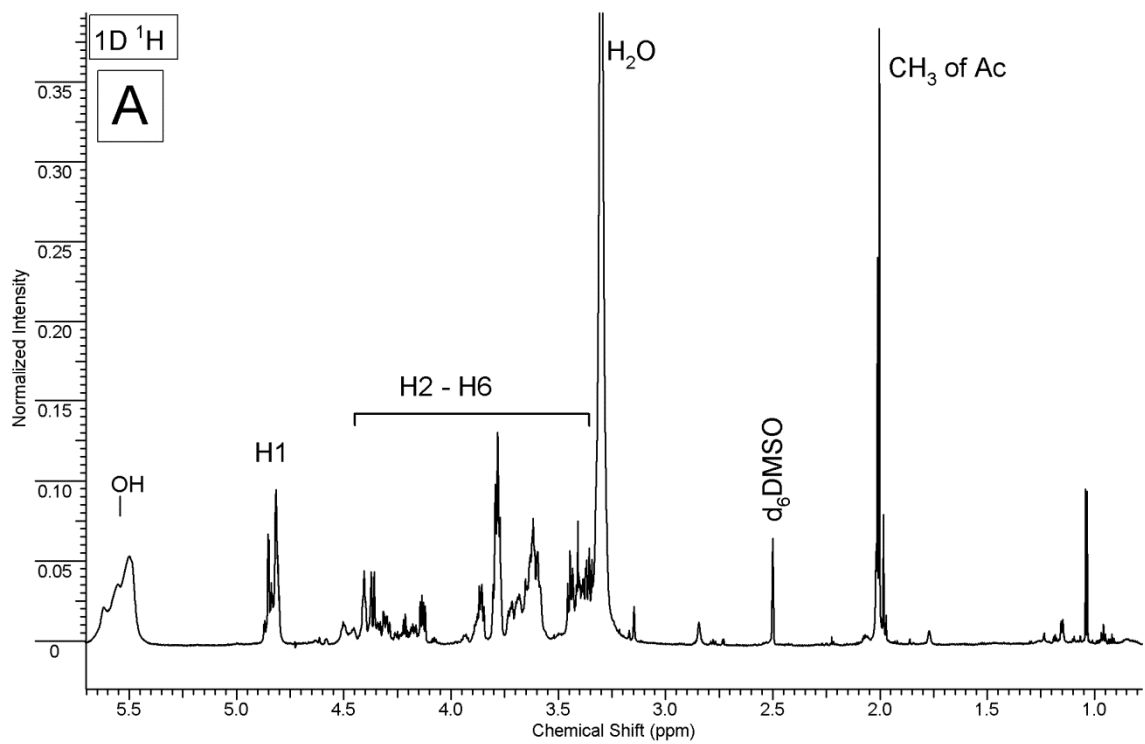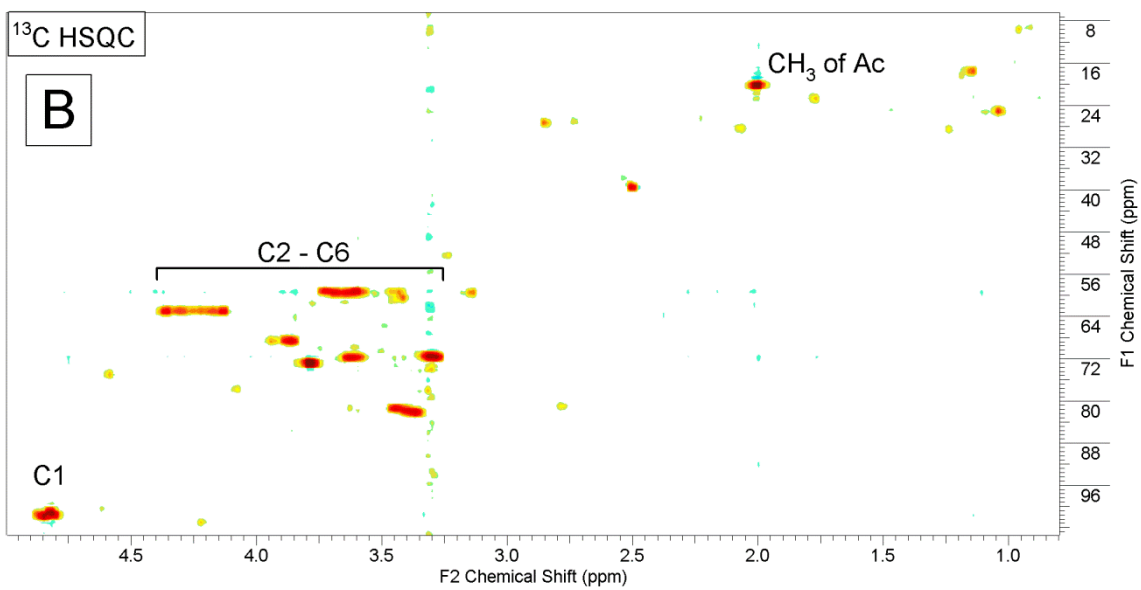



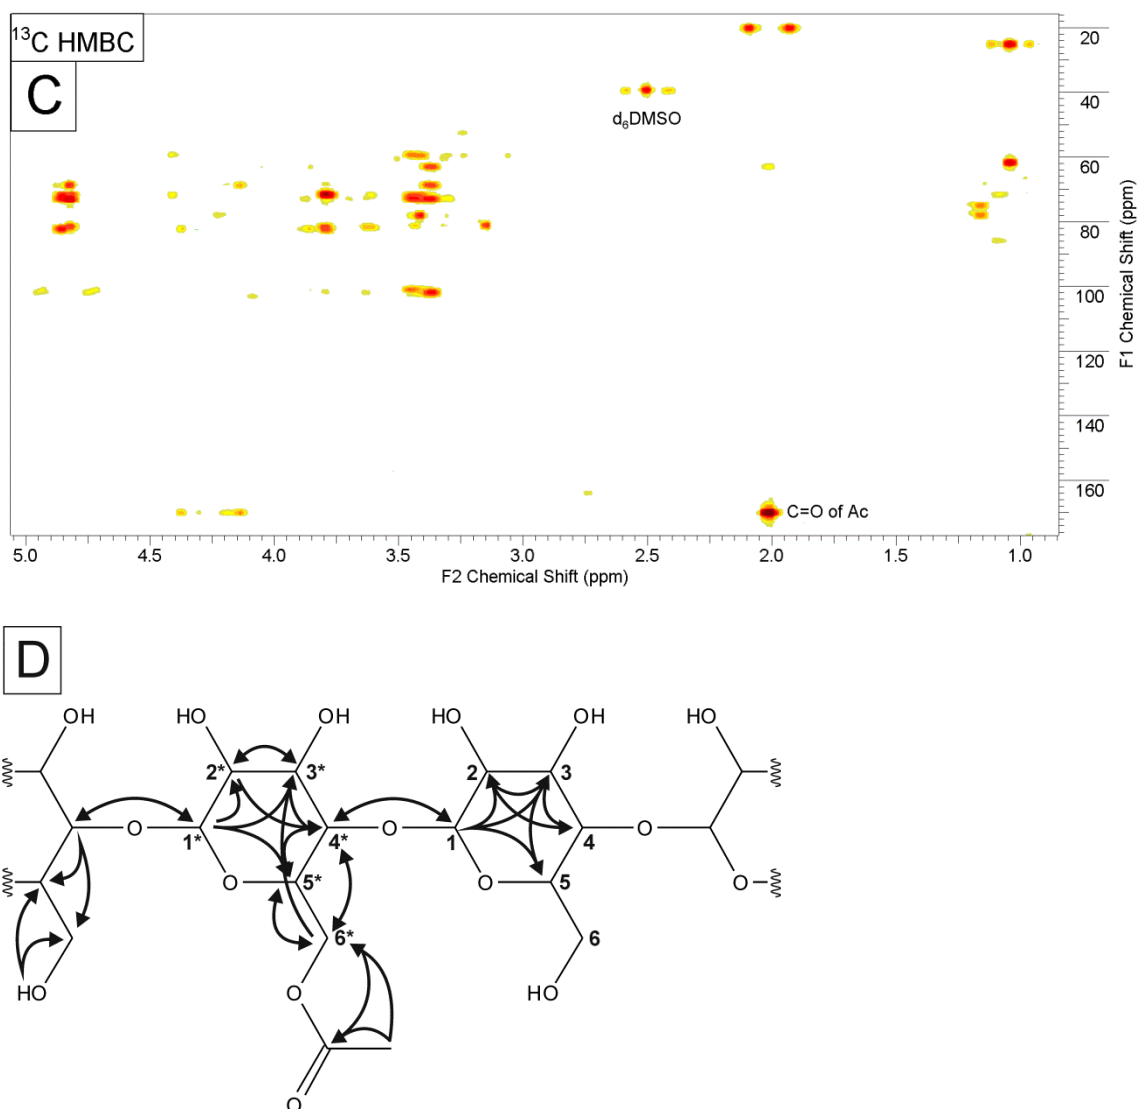

**Fig. S6.** NMR spectra of the cyclodextrin mixture from *Anabaena* sp. XSPORK2A and the structure with NMR correlations (See Fig. S4).  $^1\text{H}$  NMR spectrum (A),  $^{13}\text{C}$ -HSQC spectrum (B),  $^{13}\text{C}$  HMBC (C) and partial cyclodextrin structure with  $^{13}\text{C}$  HMBC correlations (arrows).

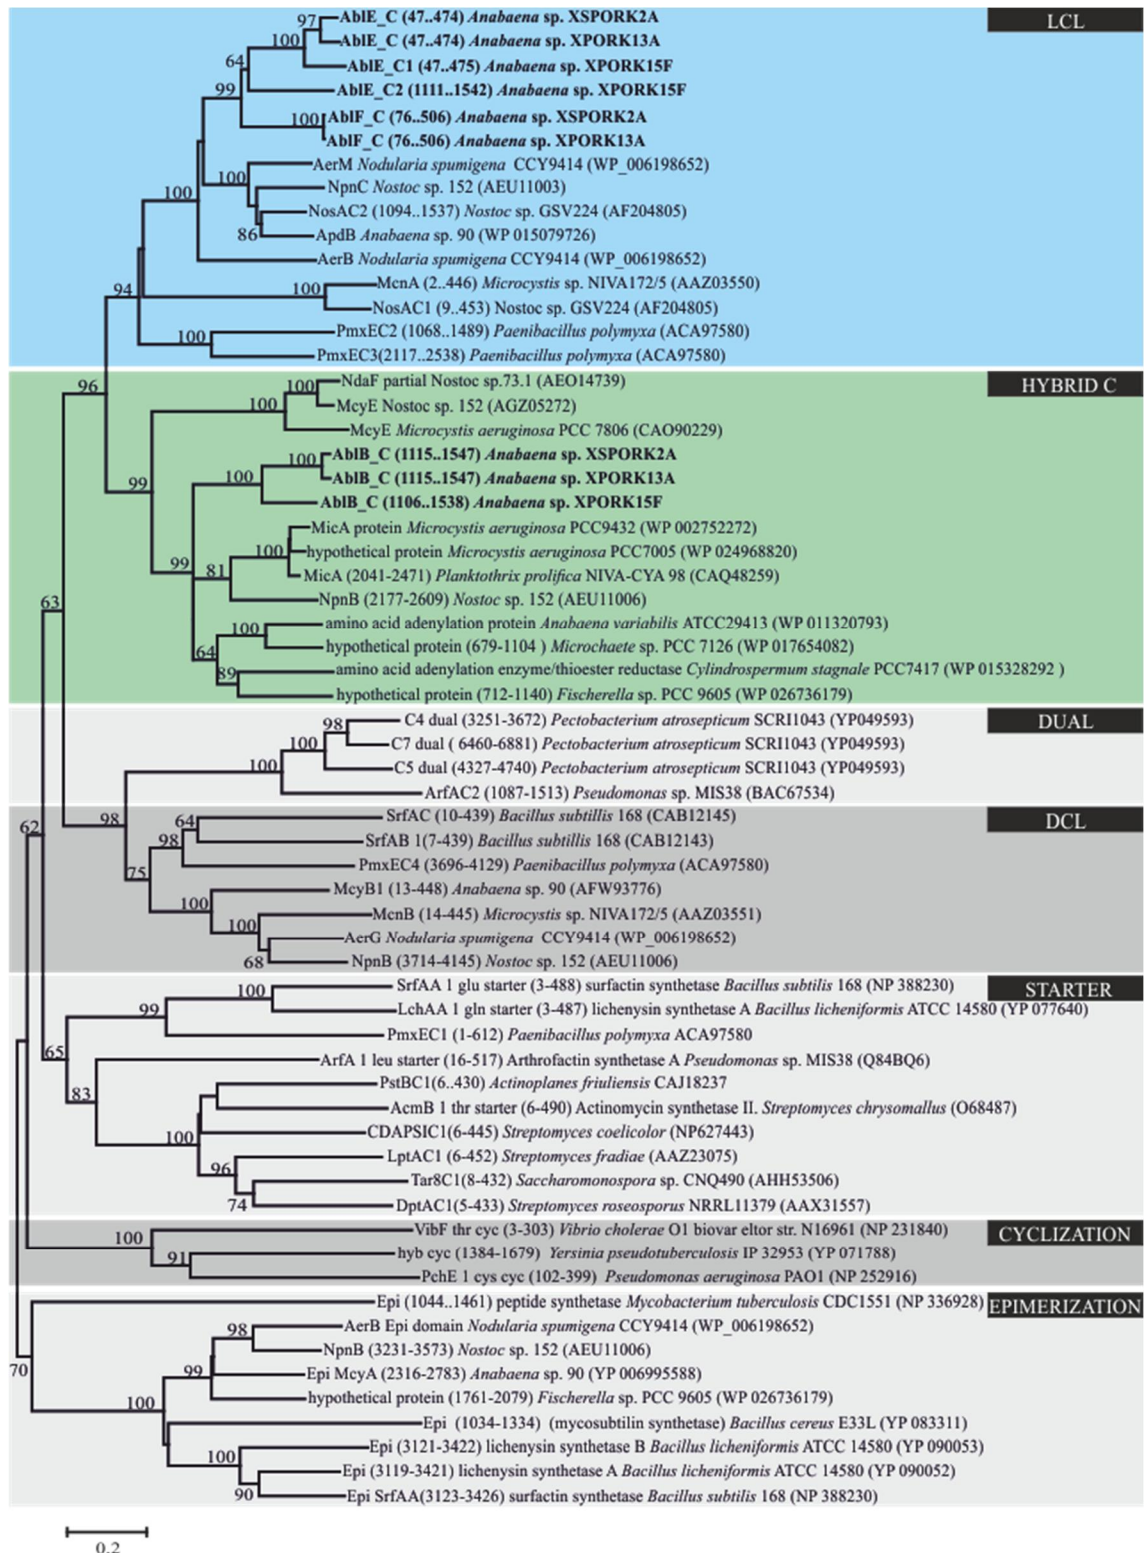

**Fig. S7. Phylogenetic tree based on sequences of the condensation domains of the anabaenolysin gene cluster.** Phylogenetic tree constructed using the Neighbor-joining method with 1000 bootstrap (values over 60% are indicated at the node).

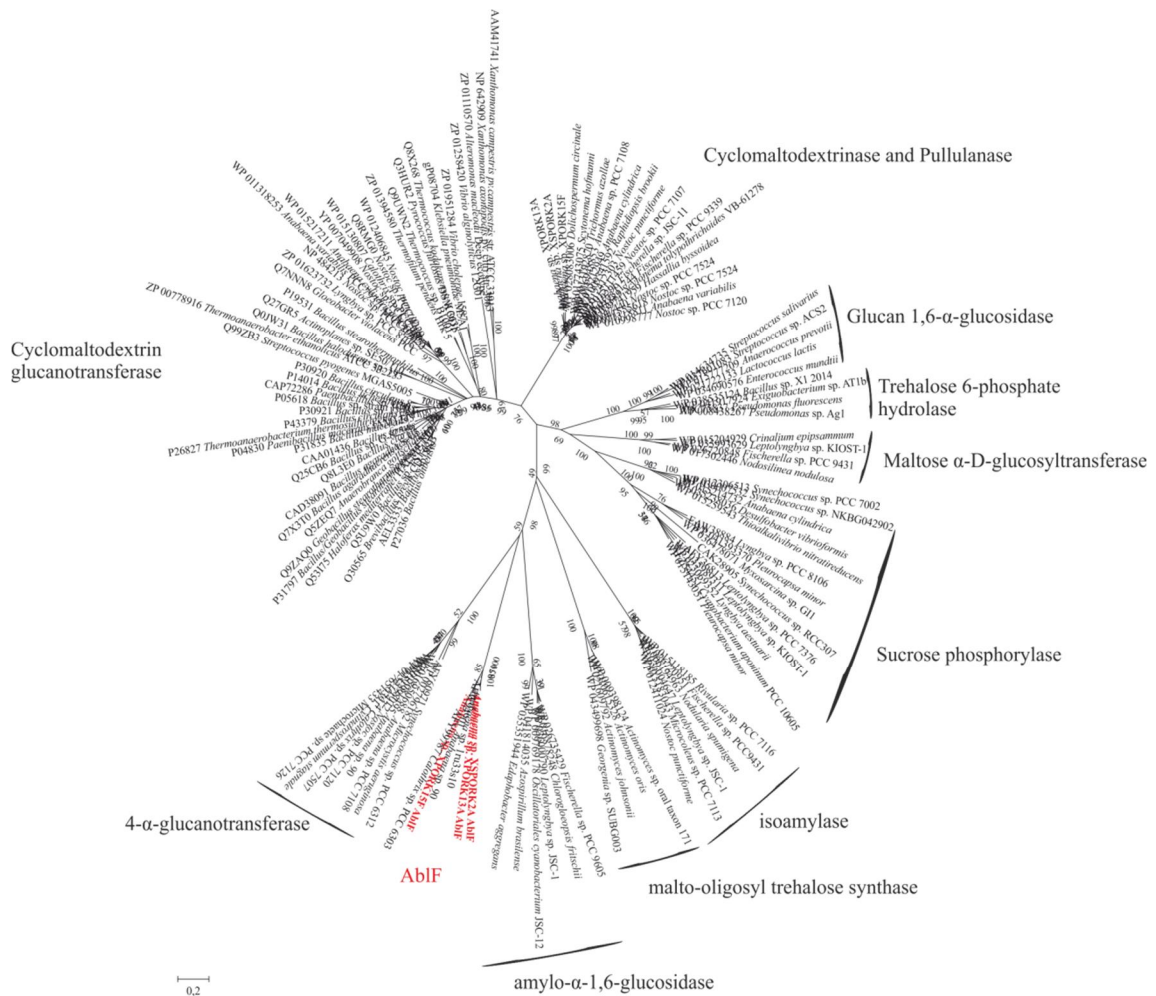

**Fig. S8. Phylogenetic tree based on amino acid sequences from alpha-amylases.** The phylogenetic tree was constructed using the Neighbor-joining method with 1000 bootstrap replicates, indicated at the node.

## 2. Supporting tables

**Table S1. Strains analyzed with HPLC for the detection of anabaenolysins.**

| <b>Taxon</b>        | <b>Strain</b> | <b>Year</b> | <b>Location</b>                     | <b>Habitat</b> |
|---------------------|---------------|-------------|-------------------------------------|----------------|
| <b>Anabaena</b>     |               |             |                                     |                |
| <i>Anabaena</i> sp. | 37            | 1985        | Lake Sääksjärvi, Finland            |                |
| <i>Anabaena</i> sp. | 318           | 1998        | Helsinki coast, “39A”, Baltic Sea   | planktonic     |
| <i>Anabaena</i> sp. | 1TU35s12      | 2001        | Lake Tuusulanjärvi, Finland         | planktonic     |
| <i>Anabaena</i> sp. | BECID19       | 2001        | Helsinki, Vuosaari, Gulf of Finland | benthic        |
| <i>Anabaena</i> sp. | BECID20       | 2001        | Helsinki, Gulf of Finland           | benthic        |
| <i>Anabaena</i> sp. | BECID22       | 2001        | Helsinki, Gulf of Finland           | benthic        |
| <i>Anabaena</i> sp. | BECID23       | 2001        | Helsinki, Gulf of Finland           | benthic        |
| <i>Anabaena</i> sp. | BECID30       | 2001        | Helsinki, Gulf of Finland           | benthic        |
| <i>Anabaena</i> sp. | BECID32       | 2001        | Helsinki, Gulf of Finland           | benthic        |
| <i>Anabaena</i> sp. | BIR3          | 2003        | Baltic Sea, Gulf of Finland         | planktonic     |
| <i>Anabaena</i> sp. | BIR25         | 2004        | Baltic Sea, Gulf of Finland         | planktonic     |
| <i>Anabaena</i> sp. | BIR32         |             |                                     |                |
| <i>Anabaena</i> sp. | BIR42         |             |                                     |                |
| <i>Anabaena</i> sp. | BIR 49        | 2004        | Baltic Sea, Gulf of Finland         | planktonic     |
| <i>Anabaena</i> sp. | BIR52         | 2004        | Baltic Sea, Gulf of Finland         | planktonic     |
| <i>Anabaena</i> sp. | BIR78         | 2004        | Baltic Sea, Gulf of Finland         | planktonic     |
| <i>Anabaena</i> sp. | BIR84         | 2004        | Baltic Sea, Gulf of Finland         | planktonic     |
| <i>Anabaena</i> sp. | BIR94         | 2004        | Baltic Sea, Gulf of Finland         | planktonic     |
| <i>Anabaena</i> sp. | BIR162        | 2004        | Baltic Sea, Gulf of Finland         | planktonic     |
| <i>Anabaena</i> sp. | BIR208        | 2004        | Baltic Sea, Gulf of Finland         | planktonic     |
| <i>Anabaena</i> sp. | BIR241        | 2004        | Baltic Sea, Gulf of Finland         | planktonic     |
| <i>Anabaena</i> sp. | BIR246        | 2004        | Baltic Sea, Gulf of Finland         | planktonic     |
| <i>Anabaena</i> sp. | BIR247        | 2004        | Baltic Sea, Gulf of Finland         | planktonic     |
| <i>Anabaena</i> sp. | BIR256        | 2004        | Baltic Sea, Gulf of Finland         | planktonic     |
| <i>Anabaena</i> sp. | BIR258        | 2004        | Baltic Sea, Gulf of Finland         | planktonic     |

|                     |           |      |                                    |                    |
|---------------------|-----------|------|------------------------------------|--------------------|
| <i>Anabaena</i> sp. | BIR260    | 2004 | Baltic Sea, Gulf of Finland        | planktonic         |
| <i>Anabaena</i> sp. | BIR348    | 2004 | Baltic Sea, Gulf of Finland        | planktonic         |
| <i>Anabaena</i> sp. | BIR441    | 2004 | Baltic Sea, Gulf of Finland        | planktonic         |
| <i>Anabaena</i> sp. | SYKE 658  | 1999 | Enäjärvi, Finland                  | planktonic         |
| <i>Anabaena</i> sp. | SYKE 748A | 1999 | Tuusulajärvi, Finland              |                    |
| <i>Anabaena</i> sp. | SYKE 844A | 1999 | Kisakallio, Finland                |                    |
| <i>Anabaena</i> sp. | XPORK1C   | 1999 | Baltic Sea, Cape Porkkala, Finland | benthic            |
| <i>Anabaena</i> sp. | XPORK1D   | 1999 | Baltic Sea, Cape Porkkala, Finland | benthic            |
| <i>Anabaena</i> sp. | XPORK4C   | 1999 | Baltic Sea, Cape Porkkala, Finland | benthic            |
| <i>Anabaena</i> sp. | XPORK4D   | 1999 | Baltic Sea, Cape Porkkala, Finland | benthic            |
| <i>Anabaena</i> sp. | XPORK5C   | 1999 | Baltic Sea, Cape Porkkala, Finland | epithytic          |
| <i>Anabaena</i> sp. | XPORK6A   | 1999 | Baltic Sea, Cape Porkkala, Finland | benthic sediment   |
| <i>Anabaena</i> sp. | XPORK6C   | 1999 | Baltic Sea, Cape Porkkala, Finland | benthic sediment   |
| <i>Anabaena</i> sp. | XPORK13A  | 1999 | Baltic Sea, Cape Porkkala, Finland | benthic            |
| <i>Anabaena</i> sp. | XPORK15D  | 1999 | Baltic Sea, Cape Porkkala, Finland | benthic, epilithic |
| <i>Anabaena</i> sp. | XPORK15F  | 1999 | Baltic Sea, Cape Porkkala, Finland | benthic            |
| <i>Anabaena</i> sp. | XPORK36C  | 1999 | Baltic Sea, Cape Porkkala, Finland | periphytic         |
| <i>Anabaena</i> sp. | XPORK36D  | 1999 | Baltic Sea, Cape Porkkala, Finland | benthic sediment   |
| <i>Anabaena</i> sp. | XSPORK2A  | 1999 | Baltic Sea, Cape Porkkala, Finland | benthic, gastropod |
| <i>Anabaena</i> sp. | XSPORK7B  | 1999 | Baltic Sea, Cape Porkkala, Finland | benthic            |
| <i>Anabaena</i> sp. | XSPORK14D | 1999 | Baltic Sea, Cape Porkkala, Finland | benthic sediment   |
| <i>Anabaena</i> sp. | XSPORK27C | 1999 | Baltic Sea, Cape Porkkala, Finland | benthic            |

#### ***Aphanizomenon***

|                          |         |      |                                    |
|--------------------------|---------|------|------------------------------------|
| <i>Aphanizomenon</i> sp. | 3       | 1985 | Lake Långajön, Ahvenanmaa, Finland |
| <i>Aphanizomenon</i> sp. | 37      | 1985 | Lake Säaskjärvi, Finland           |
| <i>Aphanizomenon</i> sp. | 201     | 1987 | Lake Bodomjärvi, Finland           |
| <i>Aphanizomenon</i> sp. | 313     | 1997 | Tuusulajarvi, Finland              |
| <i>Aphanizomenon</i> sp. | 326     | 1998 | Lake Lohjanjärvi, Finland          |
| <i>Aphanizomenon</i> sp. | 0TU37S7 | 2000 | Lake Tuusulanjärvi, Finland        |

|                               |           |      |                                                     |                     |
|-------------------------------|-----------|------|-----------------------------------------------------|---------------------|
| <i>Aphanizomenon</i> sp.      | 1TU26S2   | 2001 | Lake Tuusulanjärvi, Finland                         |                     |
| <i>Aphanizomenon</i> sp.      | 1TU29S13  | 2001 | Lake Tuusulanjärvi, Finland                         |                     |
| <i>Aphanizomenon</i> sp.      | SYKE 741  |      | Maarian allas, Finland                              |                     |
| <i>Aphanizomenon</i> sp.      | SYKE 761  |      | Raisio-Naantali, Finland                            |                     |
| <b><i>Calothrix</i></b>       |           |      |                                                     |                     |
| <i>Calothrix</i> sp.          | 336/1     |      | Vihti, Enäjärvi Laukilanlahti, Finland              |                     |
| <i>Calothrix</i> sp.          | 336/3     |      | Vihti, Enäjärvi Laukilanlahti, Finland              | benthic             |
| <i>Calothrix</i> sp.          | 441/2     |      | Lake Säyhteenjärvi, Finland                         |                     |
| <i>Calothrix</i> sp.          | BECID1    | 2001 | Helsinki, Matosaari, Finland                        | periphytic          |
| <i>Calothrix</i> sp.          | BECID4    | 2001 | Baltic Sea, Gulf of Finland                         | Brackish water      |
| <i>Calothrix</i> sp.          | BECID9    | 2001 | Baltic Sea, Gulf of Finland                         | benthic, epilithic  |
| <i>Calothrix</i> sp.          | BECID18   | 2001 | Helsinki, Vuosaari, Gulf of Finland                 | benthic, sediment   |
| <i>Calothrix</i> sp.          | BECID26   | 2001 | Baltic Sea, Vuosaari, Finland                       | benthic, epilithic  |
| <i>Calothrix</i> sp.          | BECID33   | 2001 | Helsinki, Vuosaari, Gulf of Finland                 | benthic, epilithic  |
| <i>Calothrix</i> sp.          | PCC 7507  | 1972 | near Kastanienbaum, Vierwaldstättersee, Switzerland | sphagnum bog        |
| <i>Calothrix</i> sp.          | PCC 7714  | 1969 | Small pool, Aldabra atoll, India                    | planktonic          |
| <i>Calothrix</i> sp.          | PCC 7715  | 1964 | Thermal spring, Dax, FRA                            | planktonic          |
| <i>Calothrix</i> sp.          | XPORK2B   | 1999 | Baltic Sea, Cape Porkkala, Finland                  | benthic, periphytic |
| <i>Calothrix</i> sp.          | XPORK11C  | 1999 | Baltic Sea, Cape Porkkala, Finland                  | benthic sediment    |
| <i>Calothrix</i> sp.          | XSPORK3   | 1999 | Baltic Sea, Cape Porkkala, Finland                  | -                   |
| <i>Calothrix</i> sp.          | XSPORK4A  | 1999 | Baltic Sea, Cape Porkkala, Finland                  | epiphytic           |
| <i>Calothrix</i> sp.          | XSPORK10A | 1999 | Baltic Sea, Cape Porkkala, Finland                  | benthic, epilithic  |
| <i>Calothrix</i> sp.          | XSPORK36C | 1999 | Baltic Sea, Cape Porkkala, Finland                  | periphytic          |
| <b><i>Cylindrospermum</i></b> |           |      |                                                     |                     |
| <i>Cylindrospermum</i> sp.    | PCC 7417  | 1972 | Greenhouse, Stockholm, Sweden                       | soil                |
| <b><i>Fischerella</i></b>     |           |      |                                                     |                     |
| <i>Fischerella</i> sp.        | PCC 7414  | 1979 | Hot spring, New Zealand                             | planktonic          |

|                                |             |      |                                      |                       |
|--------------------------------|-------------|------|--------------------------------------|-----------------------|
| <i>Fischerella</i> sp.         | SAG 1427-1  | 1951 | Rice field, Allahabad, India         | soil                  |
| <b><i>Hapalosiphon</i></b>     |             |      |                                      |                       |
| <i>Hapalosiphon hibernicus</i> | BZ23-1      | 1984 |                                      |                       |
| <b><i>Nodularia</i></b>        |             |      |                                      |                       |
| <i>Nodularia</i> sp.           | 7804        | 1966 | Thermal spring, Dax, France          | benthic               |
| <i>Nodularia harveyana</i>     | B053        | 1992 | Baltic Sea                           | Shallow coastal water |
| <i>Nodularia</i> sp.           | BECID27     | 2001 | Helsinki, Vuosaari, Gulf of Finland  | benthic, epiphytic    |
| <i>Nodularia</i> sp.           | BECID29     | 2001 | Baltic Sea, Vuosaari, Finland        | benthic, epilithic    |
| <i>Nodularia</i> sp.           | BECID36     | 2002 | Sipoo, Gulf of Finland               | epilithic             |
| <i>Nodularia</i> sp.           | BY1         | 1986 | Brackish water, Baltic Sea, bloom    | planktonic            |
| <i>Nodularia</i> sp.           | HEM         | 1986 | Brackish water, Baltic Sea           | planktonic            |
| <i>Nodularia</i> sp.           | PCC 73104/1 | 1979 | Spotted lake, Brit Columbia, Canada  | soil                  |
| <b><i>Nostoc</i></b>           |             |      |                                      |                       |
| <i>Nostoc</i> sp.              | 342/7       |      | Kemiö, Pederså                       |                       |
| <i>Nostoc</i> sp.              | ATCC 53789  |      | Arron Island, Scotland               | Lichen                |
| <i>Nostoc</i> sp.              | BECID2      | 2001 | Suomenlahti, Karpinlahti, Finland    |                       |
| <i>Nostoc</i> sp.              | IO-102-I    | 2000 | Sysmä, Finland (Pannaria pezizoides) | lichen                |
| <i>Nostoc</i> sp.              | UK 18 BV    |      | Autti, Finland                       | lichen                |
| <i>Nostoc elliposporum</i>     | V           | 1990 | Nezamyslice, Czech Republic          | field                 |
| <i>Nostoc calcicola</i>        | VI          | 1998 | Dobre Pole, Czech Republic           | field                 |
| <i>Nostoc</i> sp.              | XHIID A6    |      | Hiidenvesi, Kirkkojärvi, Finland     | benthic               |
| <i>Nostoc</i> sp.              | XHIID C12   |      | Hiidenvesi, Nummelanselkä, Finland   |                       |
| <i>Nostoc</i> sp.              | XPORK4A     | 1999 | Baltic Sea, Cape Porkkala, Finland   | benthic               |
| <i>Nostoc</i> sp.              | XPORK5A     | 1999 | Baltic Sea, Cape Porkkala, Finland   | epiphytic             |
| <i>Nostoc</i> sp.              | XPORK14A    | 1999 | Baltic Sea, Cape Porkkala, Finland   | benthic               |
| <i>Nostoc</i> sp.              | XPORK15C    | 1999 | Baltic Sea, Cape Porkkala, Finland   | benthic               |
| <i>Nostoc</i> sp.              | XPORK24A    | 1999 | Baltic Sea, Cape Porkkala, Finland   | -                     |

|                              |                     |      |                                            |                     |
|------------------------------|---------------------|------|--------------------------------------------|---------------------|
| <i>Nostoc</i> sp.            | XPORK24B            | 1999 | Baltic Sea, Cape Porkkala, Finland         | -                   |
| <b><i>Oscillatoria</i></b>   |                     |      |                                            |                     |
| <i>Oscillatoria</i> sp.      | UK3                 |      | Itä-Pakila, Helsinki, Finland              | lichen              |
| <b><i>Planktothrix</i></b>   |                     |      |                                            |                     |
| <i>Planktothrix</i> sp.      | 126/8               | 1984 | Lake Vesijärvi, Finland                    |                     |
| <i>Planktothrix</i> sp.      | CYA 18              | 1971 | Lake Gjersjøen, Norway                     | planktonic          |
| <b><i>Rivularia</i></b>      |                     |      |                                            |                     |
| <i>Rivularia</i> sp.         | BECID10             | 2001 | Helsinki, Herttoniemi, Baltic Sea, Finland | benthic, epilithic  |
| <i>Rivularia</i> sp.         | BECID14             | 2001 | Helsinki Hettoniemi, Gulf of Finland       | benthic, epilithic  |
| <i>Rivularia</i> sp.         | XPORK3A             | 1999 | Baltic Sea, Cape Porkkala, Finland         | periphytic, benthic |
| <i>Rivularia</i> sp.         | XPORK16B            | 1999 | Baltic Sea, Cape Porkkala, Finland         | benthic, epilithic  |
| <b><i>Scytonema</i></b>      |                     |      |                                            |                     |
| <i>Scytonema</i> sp.         | PCC 7110            | 1971 | Limestone, Bermuda                         | limestone           |
| <b><i>Snowella</i></b>       |                     |      |                                            |                     |
| <i>Snowella</i> sp.          | 0TU37S4             | 2000 | Lake Tuusulanjärvi, Finland                |                     |
| <b><i>Tolypothrix</i></b>    |                     |      |                                            |                     |
| <i>Tolypothrix</i> sp.       | TOL328              | 1999 | Kuopio, FI, Greenhouse                     | soil                |
| <b><i>Trichormus</i></b>     |                     |      |                                            |                     |
| <i>Trichormus doliolum</i>   | 1                   |      | unknown                                    |                     |
| <i>Trichormus</i> sp.        | HIID B6.A           | 1999 | Hiidenvesi, Mustionselkä, Finland          |                     |
| <i>Trichormus azollae</i>    | Kom BAI/1983        | 1983 | Unknown                                    |                     |
| <i>Trichormus variabilis</i> | Tric Von Greifswald | 1992 | Unknown                                    |                     |



| unknown |             |      |                                        |                  |
|---------|-------------|------|----------------------------------------|------------------|
| unknown | Has 1458    |      |                                        |                  |
| unknown | HIID A18.A  | 1999 | Hiidenvesi, Kirkkojärvi, Finland       |                  |
| unknown | HIID A25.A  | 1999 | Hiidenvesi, Kirkkojärvi, Finland       |                  |
| unknown | HIID A5.A   | 1999 | Hiidenvesi, Kirkkojärvi, Finland       |                  |
| unknown | HIID A7     | 1999 | Hiidenvesi, Kirkkojärvi Finland        |                  |
| unknown | HIID B11.B  | 1999 | Hiidenvesi, Mustionselkä, Finland      |                  |
| unknown | HIID B22.A  | 1999 | Hiidenvesi, Mustionselkä, Finland      |                  |
| unknown | HIID B4.B   | 1999 | Hiidenvesi, Mustionselkä, Finland      |                  |
| unknown | 335/4       |      | Juupajoki, Kukkolahti, Finland         |                  |
| unknown | P10         |      |                                        |                  |
| unknown | SMIX5       |      |                                        |                  |
| unknown | UHCC0003    |      | Tuusulanjarvi, Finland                 |                  |
| unknown | UHCC0006    |      | Pernajanlahti, Finland                 |                  |
| unknown | UHCC0007    |      | Pernajanlahti, Finland                 |                  |
| unknown | UHCC0008    |      | Vaskijärvi, Finland                    |                  |
| unknown | UHCC0013    |      | Vuotiainen, Finland                    |                  |
| unknown | UHCC0020    |      |                                        |                  |
| unknown | UHCC0021    |      |                                        |                  |
| unknown | UHCC0023    |      |                                        |                  |
| unknown | UHCC019     |      |                                        |                  |
| unknown | XHIID B16.A |      |                                        |                  |
| unknown | XHIID C1    |      | Hiidenvesi, Nummelanselkä, Finland     | benthic          |
| unknown | XHIID D14   |      | Hiidenvesi, Kiihtelyksenselkä, Finland | benthic          |
| unknown | XHIID D4    |      | Hiidenvesi, Kiihtelyksenselkä, Finland |                  |
| unknown | XHIID D8    |      | Hiidenvesi, Kiihtelyksenselkä, Finland |                  |
| unknown | XPORK2C     | 1999 | Baltic Sea, Cape Porkkala, Finland     | gastropod        |
| unknown | XPORK14F    | 1999 | Baltic Sea, Cape Porkkala, Finland     | benthic          |
| unknown | XSPORK14A   | 1999 | Baltic Sea, Cape Porkkala, Finland     | benthic sediment |
| unknown | XSPORK15B   | 1999 | Baltic Sea, Cape Porkkala, Finland     | benthic          |

---

|         |           |      |                                    |            |
|---------|-----------|------|------------------------------------|------------|
| unknown | XSPORK15C | 1999 | Baltic Sea, Cape Porkkala, Finland | benthic    |
| unknown | XSPORK20A | 1999 | Baltic Sea, Cape Porkkala, Finland | benthic    |
| unknown | XSPORK22A | 1999 | Baltic Sea, Cape Porkkala, Finland | benthic    |
| unknown | XSPORK24A | 1999 | Baltic Sea, Cape Porkkala, Finland | benthic    |
| unknown | XSPORK24B | 1999 | Baltic Sea, Cape Porkkala, Finland | -          |
| unknown | XSPORK34A | 1999 | Baltic Sea, Cape Porkkala, Finland | periphytic |

---

**Table S2. Growth inhibition (mm) of selected mold and yeast species by crude extracts of anabaenolysin-producing *Anabaena* spp. assessed with standard disk diffusion assays. No inhibition is marked with a minus (-).**

| Strain    | Compound | Amount<br>( $\mu\text{g}$ ) | <i>Candida</i>               | <i>Aspergillus</i>         | <i>Aspergillus</i>              |
|-----------|----------|-----------------------------|------------------------------|----------------------------|---------------------------------|
|           |          |                             | <i>albicans</i><br>HAMBI 261 | <i>flavus</i> HAMBI<br>829 | <i>parasiticus</i> HAMBI<br>827 |
| XPORK1D   | Abl-B    | 37.5                        | 18                           | 12                         | 10                              |
| XPORK1C   | Abl-B    | 37.5                        | 12                           | 18                         | 20                              |
| XSPORK2A  | Abl-B    | 37.5                        | 20                           | -                          | -                               |
| XPORK6C   | Abl-B    | 37.5                        | 16                           | 14                         | 14                              |
| XPORK13A  | Abl-C    | Nd                          | 6                            | 10                         | 10                              |
| XPORK15F  | Abl-A    | 25.0                        | 10                           | 10                         | 8                               |
| XSPORK27C | Abl-B    | 37.5                        | 20                           | 14                         | 16                              |
| XPORK36D  | Abl-B    | 37.5                        | 12                           | 14                         | 14                              |

Nd: not determined.

**Table S3. Calculated and experimental accurate masses of anabaenolysin variants A, B and C from *Anabaena* strains, mass error in ppm and calculated formulas.**

| Strain    | Abl | [M+H] <sup>+</sup> (m/z) |          | Error<br>(ppm) | Formula (M)                                                   |
|-----------|-----|--------------------------|----------|----------------|---------------------------------------------------------------|
|           |     | Calc                     | Exp      |                |                                                               |
| XPORK15F  | A   | 559.2762                 | 559.2761 | -0.34          | C <sub>28</sub> H <sub>38</sub> N <sub>4</sub> O <sub>8</sub> |
| BECID 22  | A   | 559.2762                 | 559.2757 | -1.05          | C <sub>28</sub> H <sub>38</sub> N <sub>4</sub> O <sub>8</sub> |
| XPORK1C   | B   | 561.2919                 | 561.2923 | 0.64           | C <sub>28</sub> H <sub>40</sub> N <sub>4</sub> O <sub>8</sub> |
| XPORK1D   | B   | 561.2919                 | 561.2917 | -0.43          | C <sub>28</sub> H <sub>40</sub> N <sub>4</sub> O <sub>8</sub> |
| XPORK4C   | B   | 561.2919                 | 561.2916 | -0.60          | C <sub>28</sub> H <sub>40</sub> N <sub>4</sub> O <sub>8</sub> |
| XPORK6C   | B   | 561.2919                 | 561.2916 | -0.60          | C <sub>28</sub> H <sub>40</sub> N <sub>4</sub> O <sub>8</sub> |
| XPORK36D  | B   | 561.2919                 | 561.2921 | 0.29           | C <sub>28</sub> H <sub>40</sub> N <sub>4</sub> O <sub>8</sub> |
| XSPORK2A  | B   | 561.2919                 | 561.2919 | -0.07          | C <sub>28</sub> H <sub>40</sub> N <sub>4</sub> O <sub>8</sub> |
| XSPORK27C | B   | 561.2919                 | 561.2917 | -0.43          | C <sub>28</sub> H <sub>40</sub> N <sub>4</sub> O <sub>8</sub> |
| BECID30   | B   | 561.2919                 | 561.2915 | -0.78          | C <sub>28</sub> H <sub>40</sub> N <sub>4</sub> O <sub>8</sub> |
| XPORK13A  | C   | 632.3290                 | 632.3289 | -0.24          | C <sub>31</sub> H <sub>45</sub> N <sub>5</sub> O <sub>9</sub> |
| XPORK13A  | D   | 634,3446                 | 634.3434 | -2.05          | C <sub>31</sub> H <sub>47</sub> N <sub>5</sub> O <sub>9</sub> |

**Table S4.  $^1\text{H}$  and  $^{13}\text{C}$  NMR data for anabaenolysin C (1) from *Anabaena* sp. XPORK13A in  $d_6$ -DMSO.**

| Substructure       | C/H no            | $\delta\text{C}/\delta\text{N}$ | $\delta\text{H}$      | multip.; $J(\text{Hz})$ |
|--------------------|-------------------|---------------------------------|-----------------------|-------------------------|
| AHFA <sup>1</sup>  | CO                | 171.8                           | -                     |                         |
|                    | 2                 | 71.2                            | 3.77                  |                         |
|                    | 2-OH              | -                               | -                     |                         |
|                    | 3                 | 51.0                            | 4.00                  |                         |
|                    | 3-NH              | 125.4                           | 7.41                  | d (8.5)                 |
|                    | 4                 | 33.2                            | 2.16                  |                         |
|                    | 4'                | -                               | 2.31                  | ddd (7.2, 7.2, 14.6)    |
|                    | 5                 | 129.7                           | 5.56                  | (7.2)                   |
|                    | 6                 | 132.3                           | 6.09                  |                         |
|                    | 7                 | 130.3                           | 6.09                  |                         |
|                    | 8                 | 131.2                           | 6.11                  |                         |
|                    | 9                 | 130.2                           | 6.05                  | dd (9.9, 14.7)          |
|                    | 10                | 134.2                           | 5.68                  | dt (7.3, 14.7)          |
|                    | 11                | 31.8                            | 2.05                  | dt (6.7, 7.3)           |
|                    | 12                | 28.3                            | 1.34                  |                         |
|                    | 13                | 28.0                            | 1.26                  |                         |
|                    | 14                | 28.0                            | 1.26                  |                         |
|                    | 15                | 28.1                            | 1.33                  |                         |
| 16                 | 32.9              | 2.00                            | dt (7.0, 7.3)         |                         |
| 17                 | 138.5             | 5.79                            | ddt (6.6, 10.3, 17.1) |                         |
| 18                 | 114.4             | 4.93                            | dd (1.8, 10.3)        |                         |
|                    |                   | 4.99                            | dd (1.8, 17.1)        |                         |
| AOFHA <sup>2</sup> | CO                | 171.2                           | -                     |                         |
|                    | 2-OH              | -                               | -                     |                         |
|                    | 2                 | 72.3                            | 3.99                  |                         |
|                    | 2*                | 84.0                            | 4.43                  | dd (9.7, 3.9)           |
|                    | 3*                | 47.1                            | 4.53                  | m                       |
|                    | 3*-NH             | 128.6                           | 8.05                  | d (5.5)                 |
|                    | 4*                | 34.4                            | 2.36                  | q(4.4, 18.0)            |
|                    | 4*,'              |                                 | 2.99                  | q(9.9, 17.6)            |
|                    | 5*-CO             | 175.2                           | -                     |                         |
| Gln <sup>3</sup>   | CO                | 171.6                           | -                     |                         |
|                    | 2                 | 53.6                            | 4.04                  | dt (7.3, 7.3)           |
|                    | 3                 | 25.9                            | 1.87                  | m                       |
|                    | 3'                |                                 | 1.91                  |                         |
|                    | 4                 | 31.3                            | 2.10, 2.14            |                         |
|                    | 4-CO              | 173.5                           | -                     |                         |
|                    | 5-NH <sub>2</sub> | 116.5                           | 6.78, 7.30            | s, s                    |
| NH                 | 127.4             | 8.51                            | d (7.0)               |                         |
| Gly <sup>4</sup>   | CO                | 168.3                           | -                     |                         |
|                    | 2                 | 42.1                            | 3.28                  | dd (3.3, 15.4)          |
|                    | 2'                | -                               | 3.98                  |                         |

NH 111.3 7.71 br

---

AOFHA = (3-amino-5-oxotetrahydrofuran-2-yl)(hydroxy)acetic acid

AHFA = (5*E*,7*E*,9*E*)-3-amino-2-hydroxyoctadeca-5,7,9,17-tetraenoic acid

**Table S5. Calculated and measured product ion intensities (%) of sodiated diAc- $\alpha$ -CD regioisomers AB, AC and AD; triAc- $\alpha$ -CD regioisomers ABC, ACD and ACE; tetraAc- $\alpha$ -CD regioisomers ABCD, ABCE and ABDE; diAc- $\beta$ -CD regioisomers AB, AC and AD and triAc- $\beta$ -CD regioisomers ABC, ABD, ABE and ACE.** Glucose units A–G presented in Fig. 2. The most important characteristic intensities are highlighted with grey. CD = cyclodextrin, AC = acetyl.

| Calculated and measured (compounds 6-17) product ion intensities of sodiated $\alpha$ - and $\beta$ -cyclodextrin (CD) isomers |                     |                    |    |    |     |    |    |                     |     |     |     |       |     |                       |      |      |           |                   |    |       |    |                    |     |     |     |         |
|--------------------------------------------------------------------------------------------------------------------------------|---------------------|--------------------|----|----|-----|----|----|---------------------|-----|-----|-----|-------|-----|-----------------------|------|------|-----------|-------------------|----|-------|----|--------------------|-----|-----|-----|---------|
| Compound No:                                                                                                                   |                     | diAc- $\alpha$ -CD |    |    |     |    |    | triAc- $\alpha$ -CD |     |     |     |       |     | tetraAc- $\alpha$ -CD |      |      |           | diAc- $\beta$ -CD |    |       |    | triAc- $\beta$ -CD |     |     |     |         |
| No of                                                                                                                          |                     | 7                  |    | 6  |     | 9  |    | 10                  |     | 8   |     | 11/12 |     |                       |      | 15   |           |                   |    | 16/17 |    |                    |     |     |     |         |
| Glc                                                                                                                            | Ac                  | Calculated         |    |    |     |    |    | Calculated          |     |     |     |       |     | Calculated            |      |      |           | Calculated        |    |       |    | Calculated         |     |     |     |         |
|                                                                                                                                | [M+Na] <sup>+</sup> | (m/z)              | AB | AC | AD  | AC | AB | ABC                 | ACD | ACE | ACE | ACE   | ABC | ABCD                  | ABCE | ABDE | ABCE/ABDE | AB                | AC | AD    | AB | ABC                | ABD | ABE | ACE | ABD/ABE |
| 6                                                                                                                              | 0                   | 995                |    |    |     |    |    |                     |     |     |     |       |     |                       |      |      |           | 0                 | 0  | 0     | 0  | 0                  | 0   | 0   | 0   | 0       |
|                                                                                                                                | 1                   | 1037               |    |    |     |    |    |                     |     |     |     |       |     |                       |      |      |           | 29                | 29 | 29    | 37 | 0                  | 0   | 0   | 0   | 3       |
|                                                                                                                                | 2                   | 1079               |    |    |     |    |    |                     |     |     |     |       |     |                       |      |      |           | 71                | 71 | 71    | 62 | 43                 | 43  | 43  | 43  | 54      |
|                                                                                                                                | 3                   | 1121               |    |    |     |    |    |                     |     |     |     |       |     |                       |      |      |           |                   |    |       |    | 57                 | 57  | 57  | 57  | 43      |
| 5                                                                                                                              | 0                   | 833                | 0  | 0  | 0   | 0  | 0  | 0                   | 0   | 0   | 0   | 0     | 0   | 0                     | 0    | 0    | 0         | 14                | 0  | 0     | 25 |                    |     |     |     |         |
|                                                                                                                                | 1                   | 875                | 33 | 33 | 33  | 31 | 27 | 0                   | 0   | 0   | 0   | 0     | 0   | 0                     | 0    | 0    | 0         | 29                | 57 | 57    | 44 | 0                  | 0   | 0   | 0   | 0       |
|                                                                                                                                | 2                   | 917                | 67 | 67 | 67  | 69 | 73 | 50                  | 50  | 50  | 49  | 45    | 51  | 0                     | 0    | 0    | 0         | 57                | 43 | 43    | 30 | 29                 | 14  | 14  | 0   | 27      |
|                                                                                                                                | 3                   | 959                |    |    |     |    |    | 50                  | 50  | 50  | 51  | 55    | 49  | 67                    | 67   | 67   | 62        |                   |    |       |    | 29                 | 57  | 57  | 86  | 54      |
|                                                                                                                                | 4                   |                    |    |    |     |    |    |                     |     |     |     |       | 33  | 33                    | 33   | 38   |           |                   |    |       | 43 | 29                 | 29  | 14  | 19  |         |
| 4                                                                                                                              | 0                   | 671                | 17 | 0  | 0   | 1  | 14 | 0                   | 0   | 0   | 0   | 0     | 0   | 0                     | 0    | 0    | 0         | 29                | 14 | 0     | 36 |                    |     |     |     |         |
|                                                                                                                                | 1                   | 713                | 33 | 67 | 67  | 63 | 30 | 33                  | 17  | 0   | 2   | 5     | 31  | 0                     | 0    | 0    | 0         | 29                | 57 | 86    | 28 | 14                 | 0   | 0   | 0   | 4       |
|                                                                                                                                | 2                   | 755                | 50 | 33 | 33  | 36 | 56 | 33                  | 67  | 100 | 97  | 91    | 39  | 50                    | 33   | 33   | 31        | 43                | 29 | 14    | 36 | 29                 | 43  | 29  | 29  | 43      |
|                                                                                                                                | 3                   | 797                |    |    |     |    |    | 33                  | 17  | 0   | 1   | 4     | 30  | 33                    | 67   | 67   | 68        |                   |    |       |    | 29                 | 43  | 71  | 71  | 47      |
|                                                                                                                                | 4                   |                    |    |    |     |    |    |                     |     |     |     |       | 17  | 0                     | 0    | 1    |           |                   |    |       | 29 | 14                 | 0   | 0   | 7   |         |
| 3                                                                                                                              | 0                   | 509                | 33 | 17 | 0   | 12 | 23 | 17                  | 0   | 0   | 0   | 0     | 7   | 0                     | 0    | 0    | 0         | 43                | 29 | 14    | 53 |                    |     |     |     |         |
|                                                                                                                                | 1                   | 551                | 33 | 67 | 100 | 66 | 38 | 33                  | 50  | 50  | 41  | 46    | 32  | 33                    | 17   | 0    | 6         | 29                | 57 | 86    | 18 | 29                 | 14  | 0   | 0   | 9       |
|                                                                                                                                | 2                   | 593                | 33 | 17 | 0   | 21 | 40 | 33                  | 50  | 50  | 58  | 53    | 40  | 33                    | 67   | 100  | 82        | 29                | 14 | 0     | 29 | 29                 | 43  | 71  | 71  | 69      |
|                                                                                                                                | 3                   | 635                |    |    |     |    |    | 17                  | 0   | 0   | 0   | 0     | 21  | 33                    | 17   | 0    | 11        |                   |    |       |    | 29                 | 43  | 29  | 29  | 18      |

|   |   |     |    |    |    |    |    |    |    |     |    |    |    |    |    |    |    |    |    |    |    |    |    |    |    |                |   |
|---|---|-----|----|----|----|----|----|----|----|-----|----|----|----|----|----|----|----|----|----|----|----|----|----|----|----|----------------|---|
|   | 4 |     |    |    |    |    |    |    |    |     |    |    |    | 0  | 0  | 0  | 0  |    |    |    |    |    | 14 | 0  | 0  | 0              | 4 |
| 2 | 0 | 347 | 50 | 33 | 33 | 22 | 22 | 33 | 17 | 0   | 0  | 2  | 17 | 17 | 0  | 0  | 1  | 57 | 43 | 43 | 23 |    |    |    |    |                |   |
|   | 1 | 389 | 33 | 67 | 67 | 77 | 40 | 33 | 67 | 100 | 98 | 93 | 38 | 33 | 67 | 67 | 49 | 29 | 57 | 57 | 52 | 43 | 29 | 29 | 14 | 0 <sup>a</sup> |   |
|   | 2 | 431 | 17 | 0  | 0  | 1  | 37 | 33 | 17 | 0   | 2  | 5  | 44 | 50 | 33 | 33 | 50 | 14 | 0  | 0  | 26 | 29 | 57 | 57 | 86 | 71             |   |
|   | 3 | 473 |    |    |    |    |    | 0  | 0  | 0   | 0  | 0  | 0  | 0  | 0  | 0  | 0  |    |    |    |    | 29 | 14 | 14 | 0  | 29             |   |
|   | 4 |     |    |    |    |    |    |    |    |     |    |    |    | 0  | 0  | 0  | 0  |    |    |    |    | 0  | 0  | 0  | 0  | 0              |   |

<sup>a</sup> = Product ions  $\approx$  27% smaller than the parent ion are unstable in the ion trap.

**Table S6.  $^1\text{H}$  and  $^{13}\text{C}$  NMR data for the cyclodextrin mixture from *Anabaena* sp. XSPORK2A in  $d_6$ -DMSO.**

| No              | $\delta\text{C}$ | $\delta\text{H}$ | mult., J (Hz) | HMBC (H $\rightarrow$ C)   |
|-----------------|------------------|------------------|---------------|----------------------------|
| 1               | 101.8            | 4.85             | d, 4.8        | 1, 2, 3, 4*, 5             |
| 2, 2*           | 71.6             | 3.31             |               | 3                          |
| 3, 3*           | 72.9             | 3.79             |               | 1, 1*, 2, 2*, 4, 4*, 5, 5* |
| 4               | 81.6             | 3.45             |               | 1*, 2, 3, 5, 6             |
| 5               | 71.8             | 3.62             |               | 1, 3, 4                    |
| 6               | 59.5             | 3.62             |               | 4, 5                       |
| 6'              |                  | 3.69             |               | 3                          |
| OH-2, 2*, 3, 3* | -                | 5.50             |               | -                          |
|                 |                  | 5.55             |               |                            |
|                 |                  | 5.62             |               |                            |
| OH-6            | -                | 4.40             |               | 5, 6                       |
| 1*              | 101.3            | 4.82             | d, 3.3        | 1*, 4, 2*, 3*, 5*          |
| 4*              | 82.2             | 3.37             |               | 1, 3*, 5*, 6*              |
| 5*              | 68.7             | 3.87             |               | 4*, 6*                     |
| 6*              | 63.0             | 4.16             |               | 4*, 5*, 7*                 |
| 6*,'            |                  | 4.34             |               | 4*, 5*, 7*                 |
| 7*              | 171.1            | -                |               | -                          |
| 8*              | 20.2             | 2.00             | s             | 7*, 8*                     |
|                 |                  | 2.01             |               |                            |
|                 |                  | 2.02             |               |                            |

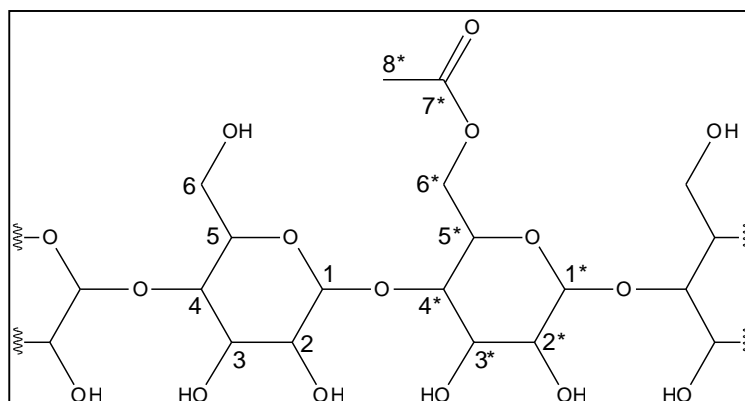



**Table S7. Prediction of amino acids selected and activated by the adenylation domains in the anabaenolysin gene cluster.**

| Strain   | NRPS module | Substrate specificity code <sup>(a)</sup> |     |     |     |     |     |     |     |     |     | Predicted substrate | Similarity (%) |
|----------|-------------|-------------------------------------------|-----|-----|-----|-----|-----|-----|-----|-----|-----|---------------------|----------------|
|          |             | 235                                       | 236 | 239 | 278 | 299 | 301 | 322 | 330 | 331 | 517 |                     |                |
| XSPORK2A | Ab1A        | D                                         | L   | T   | K   | I   | G   | H   | V   | G   | K   | Asx <sup>(b)</sup>  | 90             |
|          | Ab1D        | D                                         | I   | L   | Q   | L   | G   | V   | I   | W   | K   | Gly                 | 100            |
|          | Ab1E        | D                                         | I   | L   | Q   | L   | G   | V   | I   | W   | K   | Gly                 | 100            |
| XPORK13A | Ab1A        | D                                         | L   | T   | K   | I   | G   | H   | V   | G   | K   | Asx <sup>(b)</sup>  | 90             |
|          | Ab1D        | D                                         | A   | W   | Q   | F   | G   | L   | I   | D   | K   | Gln                 | 100            |
|          | Ab1E        | D                                         | I   | L   | Q   | L   | G   | V   | V   | W   | K   | Gly                 | 90             |
| XPORK15F | Ab1A        | D                                         | L   | T   | K   | I   | G   | H   | V   | G   | K   | Asx <sup>(b)</sup>  | 90             |
|          | Ab1D1       | D                                         | I   | L   | Q   | L   | G   | L   | I   | W   | K   | Gly                 | 100            |
|          | Ab1D2       | D                                         | I   | L   | Q   | L   | G   | L   | I   | W   | K   | Gly                 | 100            |

<sup>(a)</sup> Based on Stachelhaus et al. [45].

<sup>(b)</sup> Asx: prediction using NRPSpredictor2 (Asn) and PKS/NRPS Analysis (Asp) programs.

**Table S8. Comparison of the first hit from BLASTp in the NCBI database of amino acids sequences from *Anabaena* strains XSPORK2A, XPORK13A and XPORK15F.**

| Protein | Amino acids | Predicted function | Sequence similarity                                                                  |
|---------|-------------|--------------------|--------------------------------------------------------------------------------------|
| 1       | XSPORK2A    | 1048               | transmembrane sensor-like protein                                                    |
|         | XPORK13A    | 558                | histidine kinase [ <i>Nostoc</i> sp. PCC 7120]                                       |
|         | XPORK15F    | 253                | Unknown function                                                                     |
| 2       | XSPORK2A    | 255                | hypothetical protein                                                                 |
|         | XPORK13A    | 340                | Phosphoribosylpyrophosphate synthetase [ <i>Aphanizomenon flos-aquae</i> 2012/KM/D3] |
|         | XPORK15F    | 522                | ABC transporter                                                                      |
| 3       | XSPORK2A    | 468                | Lysin/chitinase                                                                      |
|         | XPORK13A    | 190                | hypothetical protein [ <i>Cylindrospermum stagnale</i> PCC 7417]                     |
|         | XPORK15F    | 666                | DNA helicase                                                                         |
| 4       | XSPORK2A    | 111                | hypothetical protein                                                                 |
|         | XPORK13A    | 124                | Unknown function                                                                     |

|      |          |      |                                                |                                                                                            |
|------|----------|------|------------------------------------------------|--------------------------------------------------------------------------------------------|
|      | XPORK15F | 788  | Unknown function                               | hypothetical protein [ <i>Acidobacterium capsulatum</i> ]                                  |
| 5    | XSPORK2A | 87   | hypothetical protein                           | Peptidase M15 [ <i>Leptolyngbya</i> sp. Heron Island J]                                    |
|      | XPORK13A | 182  | Unknown function                               | hypothetical protein [ <i>Geitlerinema</i> sp. PCC 7105]                                   |
|      | XPORK15F | 132  | Cell mobility                                  | PIN domain containing protein [Nostocaceae multispecies]                                   |
| 6    | XSPORK2A | 559  | Transposase                                    | Transposase [ <i>Aphanizomenon flos-aquae</i> 2012/KM/D3]                                  |
|      | XPORK13A | 137  | Unknown function                               | hypothetical protein [ <i>Cylindrospermum stagnale</i> PCC 7417]                           |
|      | XPORK15F | 98   | Unknown function                               | hypothetical protein [Nostocaceae multispecies]                                            |
| 7    | XSPORK2A | 377  | peptidoglycan binding protein                  | hypothetical protein [ <i>Synechococcus</i> sp. PCC 7335].( peptidoglycan-binding protein) |
|      | XPORK13A | 1903 | Unknown function                               | hypothetical protein [ <i>Cylindrospermum stagnale</i> PCC 7417]                           |
|      | XPORK15F | 238  | D-alaD-ala ligase                              | D-alanine-D-alanine ligase [ <i>Dolichospermum circinale</i> AWQC310F]                     |
| CamA | XSPORK2A | 669  | Unknown function (SLH-SLH-glycoside hydrolase) | hypothetical protein [ <i>Aphanizomenon flos-aquae</i> 2012/KM/D3]                         |

---

|             |          |      |                                                      |                                                                    |
|-------------|----------|------|------------------------------------------------------|--------------------------------------------------------------------|
|             | XPORK13A | 669  | Unknown function<br>(SLH-SLH-glycoside<br>hydrolase) | hypothetical protein [ <i>Aphanizomenon flos-aquae</i> 2012/KM/D3] |
|             | XPORK15F | 678  | Unknown function<br>(SLH-SLH-glycoside<br>hydrolase) | hypothetical protein [ <i>Nostoc</i> sp. PCC 7120]                 |
| NRPS (Ab1A) | XSPORK2A | 2477 | NRPS                                                 | NpnB [ <i>Nostoc</i> sp. 152]                                      |
|             | XPORK13A | 2477 | NRPS                                                 | NpnB [ <i>Nostoc</i> sp. 152]                                      |
|             | XPORK15F | 2468 | NRPS                                                 | NpnB [ <i>Nostoc</i> sp. 152]                                      |
| PKS(Ab1B)   | XSPORK2A | 1542 | PKS                                                  | polyketide synthase [ <i>Mastigocoleus testarum</i> BC008]         |
|             | XPORK13A | 1542 | PKS                                                  | polyketide synthase [ <i>Mastigocoleus testarum</i> BC008]         |
|             | XPORK15F | 1552 | PKS                                                  | polyketide synthase [ <i>Mastigocoleus testarum</i> BC008]         |
| FADS(Ab1C)  | XSPORK2A | 316  | fatty-acid desaturase                                | fatty-acid desaturase [ <i>Pleurocapsa minor</i> PCC 7327]         |
|             | XPORK13A | 316  | fatty-acid desaturase                                | fatty-acid desaturase [ <i>Pleurocapsa minor</i> PCC 7327]         |
|             | XPORK15F | 307  | fatty-acid desaturase                                | fatty-acid desaturase [ <i>Pleurocapsa minor</i> PCC 7327]         |
| NRPS (Ab1D) | XSPORK2A | 1108 | NRPS                                                 | NosC [ <i>Nostoc</i> sp. GSV224]                                   |

---

|             |          |      |                       |                                                                                                                    |
|-------------|----------|------|-----------------------|--------------------------------------------------------------------------------------------------------------------|
|             | XPORK13A | 1108 | NRPS                  | Amino acid adenylation domain [ <i>Morea producens</i> 3L]                                                         |
|             | XPORK15F | 2442 | NRPS                  | amino acid adenylation enzyme/thioester reductase family protein [ <i>Leptolyngbya</i> sp. PCC7375]                |
| NRPS (AbIE) | XSPORK2A | 1396 | NRPS                  | amino acid adenylation enzyme/thioester reductase family protein [ <i>Leptolyngbya</i> sp. PCC 7375]               |
|             | XPORK13A | 1396 | NRPS                  | amino acid adenylation enzyme/thioester reductase family protein [ <i>Leptolyngbya</i> sp. PCC7375]                |
| FADS (AbIF) | XPORK15F | 318  | fatty-acid desaturase | fatty-acid desaturase [ <i>Pleurocapsa minor</i> PCC 7327]                                                         |
| 14          | XSPORK2A | 578  | DNA repair protein    | DNA repair protein RecN [ <i>Anabaena</i> sp. 90]                                                                  |
|             | XPORK13A | 578  | DNA repair protein    | DNA repair protein RecN [ <i>Anabaena</i> sp. 90]                                                                  |
|             | XPORK15F | 574  | DNA repair protein    | DNA repair protein RecN [ <i>Trichormus azollae</i> ]                                                              |
| 15          | XSPORK2A | 573  | Response regulator    | response regulator receiver modulated diguanylate cyclase/phosphodiesterase [ <i>Anabaena cylindrica</i> PCC 7122] |
|             | XPORK13A | 573  | Response regulator    | Two-component response regulator [ <i>Anabaena</i> sp. 90]                                                         |
|             | XPORK15F | 743  | Glycoside hydrolase   | Glycoside hydrolase [ <i>Aphanizomenon flos-aquae</i> 2012/KM/D3]                                                  |
| 16          | XSPORK2A | 363  | Response regulator    | two-component response regulator [ <i>Anabaena</i> sp. 90]                                                         |
|             | XPORK13A | 363  | Response regulator    | two-component response regulator [ <i>Anabaena</i> sp. 90]                                                         |

---

---

|    |          |      |                      |                                                                                               |
|----|----------|------|----------------------|-----------------------------------------------------------------------------------------------|
|    | XPORK15F | 82   | NifU                 | Nitrogen-fixing protein NifU [ <i>Raphidiopsis brookii</i> D9]                                |
| 17 | XSPORK2A | 404  | Response regulator   | hypothetical protein [ <i>Dolichospermum circinale</i> AWQC310F]                              |
|    | XPORK13A | 404  | Response regulator   | hypothetical protein [ <i>Dolichospermum circinale</i> AWQC310F]                              |
|    | XPORK15F | 1172 | Filam. hemagglutinin | Filamentous hemagglutinin family domain-containing protein [ <i>Micrococcus</i> sp. PCC 7113] |
| 18 | XSPORK2A | 772  | Response regulator   | hypothetical protein [ <i>Mastigocoleus testarum</i> BC008]                                   |
|    | XPORK13A | 772  | Response regulator   | hypothetical protein [ <i>Mastigocladus testarum</i> BC008]                                   |
|    | XPORK15F | 960  | Unknown function     | Hypothetical protein [ <i>Anabaena</i> sp. PCC 7108]                                          |

---

**Table S9. BLASTn and BLASTp identities between *Anabaena* sp. XSPORK2A and strains XPORK13A and XPORK15F.**

| Genes or proteins                     | Nucleotide (Coverage/identity) |                   | Amino acid (Coverage/identity) |                   |
|---------------------------------------|--------------------------------|-------------------|--------------------------------|-------------------|
|                                       | XSPORK2A/XPORK13A              | XSPORK2A/XPORK15F | XSPORK2A/XPORK13A              | XSPORK2A/XPORK15F |
| CamA (Hypothetical protein $\alpha$ ) | 100/99                         | 98/76*            | 100/99                         | 99/72             |
| AblA (NRPS)                           | 100/98                         | 39/78             | 100/99                         | 99/73             |
| AblB (PKS)                            | 100/98                         | 99/75             | 100/99                         | 99/72             |
| AblC (FADS)                           | 100/99                         | 86/73*            | 100/99                         | 93/60             |
| AblD (NRPS)                           | 79/90                          | 95/80             | 100/76                         | 98/75             |
| AblE (NRPS)                           | 100/99                         | 93/79             | 100/98                         | 97/72             |
| AblF (FADS)                           | -                              | 79/73             | -                              | 100/55            |

$\alpha$  SLH-SLH-glycoside hydrolase

\*BLASTn optimized to show somewhat similar sequences. Other comparisons were optimized for highly similar sequences.

**Table S10. Primers used for cycle sequencing the 16S rRNA gene.**

| Primer     | Sequence (5' to 3')       | Direction | Locus <sup>a</sup> | Reference               |
|------------|---------------------------|-----------|--------------------|-------------------------|
| 27F        | AGAGTTTGCATCMTGGCTCAG     | forward   | 27 - 47            | [46]                    |
| pC         | CTACGGGAGGCAGCAGTGGG      | reverse   | 341-361            | [47]                    |
| CYA359F    | GGGGAATYTTCCGCAATGGY      | forward   | 359 - 378          | [48]                    |
| 16S544R    | ATTCCGGATAACGCTTGC        | reverse   | 544 - 562          | [49]                    |
| CYA781Ra   | GACTACTGGGGTATCTAATCCCATT | reverse   | 781 - 805          | [48]                    |
| pE         | AAACTCAAAGGAATTGACGG      | forward   | 908 - 928          | [46]                    |
| pE'        | CCGTCAATTCCTTTGAGTTT      | reverse   | 928 - 908          | [46]                    |
| 16S979F    | CGATGCAACGCGAAGAAC        | forward   | 979 - 998          | [49]                    |
| pF         | CATGGCTGTCGTCAGCTCGT      | forward   | 1053 - 1073        | [47]                    |
| pF'        | ACGAGCTGACGACAGCCATG      | reverse   | 1073 - 1053        | [47]                    |
| 16S1092R   | GCGCTCGTTGCGGGACTT        | reverse   | 1092 - 1110        | [49]                    |
| pG'        | ACGGGCGGTGTGTAC           | reverse   | 1407 - 1392        | [46]                    |
| 1494Rc     | TACGGCTACCTTGTTACGAC      | reverse   | 1494 - 1513        | [50]                    |
| pH'        | AAGGAGGTGATCCAGCCGCA      | reverse   | 1542 - 1522        | [47]                    |
| B23S       | CTTCGCCTCTGTGTGCCTAGGT    | reverse   | 23S                | [51]                    |
| M13F (-20) | GTAAAACGACGGCCAG          | forward   | plasmid            | commercial <sup>b</sup> |
| M13R       | CAGGAAACAGCTATGAC         | reverse   | plasmid            | commercial <sup>b</sup> |

<sup>a</sup> Positions in the 16S rRNA gene according to *E.coli* 16S rRNA nucleotide numbering; <sup>b</sup> sequences and primers as provided in the TOPO® TA Cloning® kit (Invitrogen, Life Technologies, Carlsbad, United States)

### 3. Supporting Materials and Methods

#### Cyanobacterial culture, DNA extraction and sequencing

Cyanobacterial strains (SI Appendix, Table S1) were grown in Z8 medium with or without a nitrogen source [52] under constant light (8 -14  $\mu\text{mol m}^{-2}\text{s}^{-1}$ ) at 20 to 25°C for 20 to 40 days. Strains containing heterocyst are able to fix atmospheric nitrogen and have been isolated in Z8 medium lacking a combined nitrogen source. The genomic DNA was obtained using either the E.Z.N.A.® SP Plant DNA kit (Omega Bio-tek) or the DNeasy Plant Mini Kit (Qiagen GmbH). The conditions used for amplification of the 16S rRNA sequences, as well as cloning and cycle sequencing primers [SI Appendix, Table S10] were as follows: Amplified fragments of the 16S rRNA gene were obtained with a PCR reaction containing one time Buffer solution (DyNAzyme™ PCR buffer, Finnzymes, Thermo Fischer Scientific), 0.5  $\mu\text{M}$  of forward primer 27F and 0.5  $\mu\text{M}$  of reverse primer B23S (Table S10), 200  $\mu\text{M}$  of each dNTP, 0.5 U of Taq polymerase (DyNAzyme™ II DNA polymerase, Finnzymes), sterile water and 20 ng of template DNA in a total volume of 20  $\mu\text{l}$ . The conditions of the PCR were as follows: Initial denaturation at 94°C for 5 min, 38 cycles of denaturation at 94°C for 30 s, annealing at 56°C for 30 s, extension at 72°C for 2 min, and a final extension at 72°C for 15 min. Amplified fragments of 16S rRNA gene were purified (E.Z.N.A.® MicroElute Cycle-Pure kit, Omega Bio-tek) ligated into a pCR®2.1-TOPO® plasmid and transformed into One Shot®TOPO® Chemically competent *Escherichia coli* (TOPO® TA Cloning® kit, Invitrogen). Plasmids containing the 16S rRNA gene were extracted using the QIAprep Spin Miniprep Kit (Qiagen GmbH) and used in a sequencing PCR reaction containing a BigDye® Terminator v3.1 cycle sequencing kit (Applied Biosystems, Life Technologies) and primers (SI Appendix, Table S10). The contigs were analyzed and assembled using the Phred/Phrap/Consed package (Philip Green, University of Washington, Seattle, USA). A phylogenetic tree based on 16S rRNA genes was constructed using



neighbor-joining (Kimura 2 parameter model with gamma distribution), maximum parsimony (Close-Neighbor-Interchange (CNI) on random trees) and maximum likelihood (Kimura 2-parameter model and Nearest-Neighbor-Interchange (NNI) with gamma distribution and invariant sites G+I) methods in Molecular Evolutionary Genetic Analysis (MEGA) 5 [53].

### **Genome sequencing**

*Anabaena* spp. XSPORK2A, XPORK13A and XPORK15F were grown in Z8 with no nitrogen source at 18°C under constant light and shaking at 100 RPM or bubbling with sterile air. The *Anabaena* spp. cells were collected by centrifugation at 7,000g for 7 minutes and the genomic DNA for partial genome sequencing was obtained using the phenol-chloroform method [54, 55]. Isolated DNA from the XPORK15F, XPORK13A and XSPORK2A strains were checked using a NanoDrop 1000 spectrophotometer (Thermo Scientific) to measure the concentration and an Agilent TapeStation (Agilent Technologies) to assess the quality. XSPORK2A DNA was converted in the indexed Illumina library (Illumina TruSeq® Nano DNASample Preparation Guide), and XPORK15F and XSPORK2A strains were also prepared for 454 Paired Ends sequencing according to the 3 Kb library preparation procedure. Prior to sequencing, libraries were quantitated by Real Time PCR (qPCR) by KAPA Library Quant Kits (KAPA Biosystems) and qualitatively checked with an Agilent TapeStation. XPORK15F and XPORK13A libraries were sequenced using the Illumina MiSeq platform, with a paired ends 300 cycles run while the library XSPORK2A was sequenced on the Illumina GAIIx platform using the paired ends 85 cycles run. The 454 libraries were sequenced using the Roche/454 GS-FLX pyrosequencer.

### **Anabaenolysin gene cluster**

After Roche/454 and Illumina sequencing, the reads for each strain were assembled in contigs using Newbler software (version 3.0). The different contigs were analyzed to detect possible NRPS and PKS biosynthetic gene clusters with antiSMASH [56] and 2metDB [57]. The function of the proteins was predicted using BLASTp and the Conserved Domain Search in the NCBI. The prediction for the amino acid incorporated by the adenylation domains within the anabaenolysin gene cluster was obtained using NRPSpredictor2 [58] and PKS/NRPS Analysis [57].

### **Anabaenolysin and cyclodextrin detection**

Cyanobacterial strains were screened for the production of anabaenolysin with HPLC (Agilent 1100 Series, Agilent Technologies). 170 to 900 mg of cell mass was extracted with methanol and 300 mg of 0.5mm glass beads (Scientific Industries) in a homogenizer (FastPrep®-24 instrument, MP Biomedicals) for 10s at a speed of 5 ms<sup>-1</sup>. The homogenization procedure was repeated three times, with incubation for one minute on ice between the treatments. The cell extracts were centrifuged at 20 000 x g for 5 min. The methanol extracts (5 µL) were analysed with the Luna C18 (2) reverse phase column (150 mm × 2 mm, particle size 5 µm, pore size 100 Å, Phenomenex), which was eluted with a methanol (solvent A) and water (solvent B) gradient (3 min 65% v/v of solvent A, 7 min 65% to 100% v/v of solvent A, 10 min 100% v/v of solvent A and 5 min 100% to 65% v/v of solvent A) at a flow rate of 0.15 ml min<sup>-1</sup> at 30°C. The detection of triene UV absorption of anabaenolysin with highest absorption peak at 270 nm was used as a parameter for the screening. *Anabaena* spp.

XPORK15F and XSPORK27C methanol extracts were used as standards. Samples containing triene UV absorption were analyzed with LC-ITMS (Agilent 1100 Series LC/MSD Ion Trap XCT Plus System). The sample was run in a Luna (C18) reverse phase column (150 mm × 2 mm, particle size 5 µm, pore size 100 Å, Phenomenex) eluted with acetonitrile (solvent B) and 0.1% (v/v) aqueous formic acid (solvent A) in a gradient run from 30% to 70% v/v of solvent B in 33 min at a flow rate of 0.15 ml min<sup>-1</sup> at 40°C.

In the cyclodextrin HPLC-ITMS (Agilent 1100 Series LC/MSD Ion Trap XCT Plus System) analysis, 10 µl of extracts were injected into a Luna C8 (2) column (pore size 100 Å, 150 mm × 2 mm, particle size 5 µm, Phenomenex) eluted from 100% of 0.1% HCOOH to 70% of 0.1% HCOOH in isopropanol (+ 0.1% HCOOH) in 30 min at a flow rate of 0.15 ml min<sup>-1</sup> at 40°C. Mass spectra were recorded using positive electrospray ionization in ultra-scan mode with a scan range of *m/z* 50–1700. Regioisomer structures (acetyl group positions relative to each other) were solved from the ion intensities of the product ion spectra of the sodiated cyclodextrins according to a statistical method (SI Appendix, Table S5) [59].

High-resolution UPLC-QTOF analyses were performed with Acquity I-Class UPLC-Synapt G2-Si HDMS (Waters Corp., Milford, MA, USA) system. In anabaenolysin (Abl) analyses, a 1 µl sample was injected into an Acquity UPLC BEH C<sub>18</sub> column (2.1 x 50 mm, 1.7 µm, Waters) eluted at 40°C with a flow rate of 0.3 ml min<sup>-1</sup> from 20% acetonitrile (+ 0.1% HCOOH) (solvent B) in 0.1% HCOOH to 70% of B in 5 mins, then to 95% of B in 0.01 mins, where it remained for 1.99 mins, before returning to 20% of B in 0.5 mins, where it finally remained for 2.5 mins before the next run. In cyclodextrin (CD) analyses a 1 µl sample was injected into an Acquity UPLC HSS T3 column (2.1 x 50 mm, 1.8 µm, Waters) eluted at 40°C with a flow rate of 0.3 ml min<sup>-1</sup>: first isocratically for 1 min with 0.1% HCOOH, then with 0% acetonitrile (+ 0.1% HCOOH) (solvent B) in 0.1% HCOOH to 95% of B in 5 mins, where it remained for 2 mins, before returning to 0% of B in 0.5 mins, where it finally remained for 2.5 mins before the next run. The QTOF was calibrated with sodium iodide, producing a calibrated mass range from *m/z* 322.879-2121.335 (Abl) or 322.839-2870.289 (CD). Leucine enkephalin at 10 s intervals served as a lock mass reference compound. Mass spectral data accumulated in positive electrospray ionization Resolution Mode at a scan range of *m/z* 200-2200 (Abl) or 300-3000 (CD).

### **Antifungal activity**

The disc diffusion bioassay was performed as described in [14] and [60]. Discs containing 200 µL of crude extract obtained with methanol were used. The negative control contained 100 µL of methanol, and the positive control 15 µg of nystatin (Sigma-Aldrich). Plates for *Aspergillus flavus* or *Aspergillus parasiticus* were incubated for 48h at 28°C, and for *Candida albicans* HAMBI 261 or HAMBI484, 35°C. To test the anabaenolysin synergistic activity, the methanol extract obtained from 200 mg of freeze-dried cells from strain *Anabaena* sp. XPORK1D was mixed with dichloromethane and water in a proportion of 1:1:1 (v/v). The sample was shaken and centrifuged at 10 000 *x g* for 5 min. This allowed the hydrophilic compounds in the water and methanol phases to separate from the hydrophobic compounds in the dichloromethane phase. Both phases were dried separately and re-

suspended in 1.5 mL of 65% (v/v) aqueous methanol. Compound separation took place in a Luna C18(2) reverse phase column (150 mm × 2 mm, particle size 5 μm, pore size 100 Å, Phenomenex) eluted with acetonitrile (solvent A, E CHROMASOLV®, Sigma-Aldrich) and a 0.1% (v/v) aqueous (Milli-Q purity, Millipore, Merck KGaA, Darmstadt, Germany) formic acid (Sigma-Aldrich) gradient (49 min 30% v/v of solvent A to 70% v/v A, 20 min 70% v/v of solvent B) at a flow rate of 0.15 mL min<sup>-1</sup> at a temperature of 30°C. The isolated anabaenolysin B and the fraction containing the cyclodextrins were dried and re-suspended in 200 μL of methanol. Half of this volume was added to each disc to demonstrate the synergistic activity of the compounds from *Anabaena* sp. XPORK1D.

### **New anabaenolysins C and D**

Amino acid analysis of the anabaenolysin C based on hydrolysis and derivatization using Marfey's reagent (FDAA, Pierce, Thermo Fisher Scientific) was performed as described in [61]. The derivatized amino acids of anabaenolysin C and commercial glutamine and glycine were analyzed by LC-MS as described previously [61]. Anabaenolysin C was isolated from 2.4 g of freeze-dried *Anabaena* sp. XPORK13A cell mass. Each batch of 100 mg of freeze-dried cells were extracted twice per 1 mL of methanol and glass beads in a FastPrep (6.5 ms<sup>-1</sup> per 30 s three times). The samples were centrifuged at 10 000 × g for 5 min at room temperature and combined into a single tube. Anabaenolysin C was either first isolated with HPLC using a Luna C8 column (150 × 4.6 mm, Phenomenex, Torrance, CA) in an isocratic run of acetonitrile:water (50:50 v/v) at a flow of 1 or 0.75 mL min<sup>-1</sup> at 30°C or prepurified using a conditioned solid phase extraction cartridge (Strata C18-E, 55 μM, 70Å, 5g/mL, Phenomenex) as previously described [16]. The prepurified anabaenolysin C underwent further purification with HPLC on a Luna C18 column (250 × 10 mm, Phenomenex) in an isocratic run consisting of acetonitrile:water (45:55 v/v) at a flow rate of 5 mL min<sup>-1</sup> at 30°C as previously described [16]. The solvent was evaporated using a rotary evaporator (Büchi rotavapor R-200), and the sample in water was freeze-dried, yielding a total of 1.94 mg of anabaenolysin C.

### **Cyclodextrin isolation**

Freeze-dried cells from *Anabaena* sp. XSPORK2A (21 × 100 mg) were extracted using methanol as described in the previous sub-section. A mixture of cyclodextrins were isolated in HPLC on a Luna C8 column (150 × 4.6 mm, particle size 5 μm, Phenomenex) in a gradient run of isopropanol:water (from 0 to 100% isopropanol v/v) for 25 min at 30°C. The fractions were combined and the solvent was evaporated using the rotary evaporator (Büchi rotavapor R-200). The sample was freeze-dried, yielding a 10.8 mg mixture of cyclodextrins stored at -80°C.

### **NMR spectroscopy**

For the NMR data collection, anabaenolysin C was dissolved in *d*<sub>6</sub>-DMSO. All NMR measurements were carried out at 25°C on a Varian Inova NMR spectrometer operating at 800 MHz of <sup>1</sup>H frequency and equipped with a cryogenically cooled triple-resonance <sup>1</sup>H, <sup>13</sup>C, and <sup>15</sup>N probehead. One-

dimensional  $^1\text{H}$  spectrum together with several two-dimensional homo- and heteronuclear NMR spectra were collected.  $^1\text{H}$  spectrum was acquired with 24 k complex points, which translated to an acquisition time of 2 s. Two-dimensional double-quantum filtered COSY and TOCSY experiments were collected using 256 (256) complex points in  $t_1$  ( $t_2$ ) dimension, corresponding to acquisition time of 256 ms. The isotropic mixing in the TOCSY experiment required 60 ms. Heteronuclear  $^{13}\text{C}$ -HSQC experiments optimized for establishing aliphatic  $^1\text{H}$ - $^{13}\text{C}$  (aromatic  $^1\text{H}$ - $^{13}\text{C}$ ) connectivities were collected using 128 and 852 complex points in  $t_1$  and  $t_2$  dimension, yielding acquisition times of 4.6 and 85.2 ms (10.7 and 85.2 ms), respectively. Long-range  $^1\text{H}$ - $^{13}\text{C}$  connectivities were established using a  $^{13}\text{C}$ -HMBC experiment optimized for 7 Hz ( $^1\text{H}$ - $^{13}\text{C}$  transfer delay 71.4 ms) and 5 Hz ( $^1\text{H}$ - $^{13}\text{C}$  transfer delay 100 ms) couplings. Data were collected using 128 and 1280 complex points in  $t_1$  and  $t_2$ , corresponding to acquisition times of 3.2 ms and 128 ms, respectively.  $^{15}\text{N}$ -HSQC experiment for correlating one-bond  $^1\text{H}$ - $^{15}\text{N}$  connectivities were measured using 32 and 1020 complex points in dimensions  $t_1$  and  $t_2$ , which translates to acquisition times of 10.7 and 85 ms, respectively. For structural analysis of the cyclodextrins from *Anabaena* sp. XSPORK2A, the cyclodextrin sample was dissolved into  $d_6$ -DMSO and identical sets of NMR experiments for the anabaenolysin C NMR analysis, excluding the  $^{15}\text{N}$ -HSQC, were collected at 25 °C on Varian Inova NMR 800 NMR spectrometer.

## References:

45. Stachelhaus T, Mootz HD, Marahiel MA (1999) The specificity-conferring code of adenylation domains in nonribosomal peptide synthetases. *Chem Biol* 6:493–505.
46. Lane DJ (1991) 16S/23S rRNA sequencing. In: *Nucleic acid techniques in bacterial systematics*. Eds Stackebrandt E, Goodfellow M (John Wiley and Sons, New York, NY), pp. 115-175.
47. Edwards U, Rogall T, Blöcker H, Emde M, Böttger EC (1989) Isolation and direct complete nucleotide determination of entire genes. Characterization of a gene coding for 16S ribosomal RNA. *Nucleic Acids Res* 17:7843–7853.
48. Nübel U, Garcia-Pichel F, Muyzer G (1997) PCR primers to amplify 16S rRNA genes from cyanobacteria. *Appl Environ Microbiol* 63:3327–3332.
49. Rajaniemi P, et al. (2005) Phylogenetic and morphological evaluation of the genera *Anabaena*, *Aphanizomenon*, *Trichormus* and *Nostoc* (Nostocales, Cyanobacteria). *Int J Syst Evol Microbiol* 55:11-26.
50. Neilan BA, et al. (1997) rRNA sequences and evolutionary relationships among toxic and nontoxic cyanobacteria of the genus *Microcystis*. *Int J Syst Bacteriol* 47:693-697.
51. Lepère C, Wilmotte A, Meyer B (2000) Molecular diversity of *Microcystis* strains (Cyanophyceae, Chroococcales) based on 16S rDNA sequences. *Syst Geogr* 70:275– 283.
52. Kótai J (1972) Instructions for Preparation of Modified Nutrient Solution Z8 for Algae, Blindern B-11/69 (Norwegian Institute for Water Research, Oslo).
53. Tamura K, et al. (2011) MEGA5: Molecular evolutionary genetics analysis using maximum likelihood, evolutionary distance, and maximum parsimony methods. *Mol Biol Evol* 28:2731-2739.

54. Rouhiainen L, Jokela J, Fewer DP, Urmann M, Sivonen K (2010) Two alternative starter modules for the non-ribosomal biosynthesis of specific anabaenopeptin variants in *Anabaena* (Cyanobacteria). *Chem. Biol* 17:265-273.
55. Wang H, et al. (2012) Genome-derived insights into the biology of the hepatotoxic bloom-forming cyanobacterium *Anabaena* sp. strain 90. *BMC Genomics* 13:613.
56. Blin K, et al. (2013) antiSMASH 2.0 — a versatile platform for genome mining of secondary metabolite producers. *Nucleic Acids Res* 41:W204-12.
57. Bachmann BO, Ravel J (2009) Methods for *in silico* prediction of microbial polyketides and nonribosomal peptide biosynthetic pathways from DNA sequence data. *Methods Enzymol* 458:181-217.
58. Röttig M, et al. (2011) NRPSpredictor2—a web server for predicting NRPS adenylation domain specificity. *Nucleic Acids Res* 39:W362-367.
59. Sforza S, Galaverna G, Corradini R, Dossena A, Marchelli R (2003) ESI-Mass spectrometry analysis of unsubstituted and disubstituted  $\beta$ -Cyclodextrins: fragmentation mode and identification of the AB, AC, AD regioisomers. *J Am Soc Mass Spectrom* 14:124-135.
60. Espinel-Ingroff A (2007) Standardized disk diffusion method for yeasts. *Clin Microbiol Newsletter* 29:97-100.
61. Jokela J, et al. (2010) A novel cyanobacterial nostocyclopeptide is a potent antitoxin against microcystins. *Chembiochem* 11:1594-1599.
